# Supplementary material for: Stability of Treatment Effects and Caregiver-Reported Outcomes: A Meta-Analysis of Trauma-Focused Cognitive Behavioral Therapy for Children and Adolescents
Source: PubMed Central journal article supplement (PMC10981190; doi:10.1177/10775595231167383), 2023-03-23
Supplement: sj-pdf-1-cmx-10.1177_10775595231167383.pdf [file sj-pdf-1-cmx-10.1177_10775595231167383.pdf]

**Table 6.***Overview of all Included RCTs.*

| Author (year)                                    | TF-CBT Conditions (n)               | Control Conditions (n)                                         | Design        | Participant-reported Outcomes (Instruments) | Proxy-reported Outcomes (Instruments) |
|--------------------------------------------------|-------------------------------------|----------------------------------------------------------------|---------------|---------------------------------------------|---------------------------------------|
| Allen et al. (2021)                              | TF-CBT (n = 16)                     | -                                                              | Efficacy      | PTSS (UCLA)                                 | PTSS (UCLA)                           |
|                                                  | TF-CBT, animal-assisted (n = 17)    | -                                                              |               | Depression (SMFQ)                           |                                       |
| Brown et al. (2020)                              | TF-CBT (n = 7)                      | TAU/AT, Client-Centered Therapy (n = 10)                       | Efficacy      | Anxiety (SCARED)                            |                                       |
|                                                  |                                     |                                                                |               | PTSS (CPSS)                                 |                                       |
|                                                  |                                     |                                                                |               | Depression (BASC Dep)                       |                                       |
|                                                  |                                     |                                                                |               | Anxiety (BASC Anx)                          |                                       |
|                                                  |                                     |                                                                |               | Grief (EGI-TG)                              |                                       |
| Cohen et al. (2004); Deblinger et al. (2006)     | TF-CBT (n = 89)                     | TAU/AT, Client-Centered Therapy (n = 91)                       | Efficacy      | PTSS (K-SADS <sup>1</sup> )                 |                                       |
|                                                  |                                     |                                                                |               | Depression (CDI)                            |                                       |
|                                                  |                                     |                                                                |               | Anxiety (STAIC-T)                           |                                       |
| Cohen & Mannarino (1998); Cohen et al. (2005)    | TF-CBT (n = 41)                     | TAU/AT, Non-directive Supportive Therapy (n = 41)              | Efficacy      | PTSS (TSCC-PTS)                             |                                       |
|                                                  |                                     |                                                                |               | Depression (CDI)                            |                                       |
|                                                  |                                     |                                                                |               | Anxiety (STAIC-T)                           |                                       |
| Davidson et al. (2019)                           | TF-CBT (n = 7)                      | -                                                              | Effectiveness | PTSS (UCLA)                                 | PTSS (UCLA)                           |
|                                                  | TF-CBT, tablet-facilitated (n = 17) | -                                                              |               | Depression (CESD-C)                         |                                       |
| Deblinger et al. (1996); Deblinger et al. (1999) | TF-CBT, child only (n = 21)         | TAU/AT (n = 20) <sup>2</sup>                                   | Efficacy      | PTSS (K-SADS)                               |                                       |
|                                                  | TF-CBT, child and mother (n = 19)   | TAU/AT (n = 20) <sup>2</sup>                                   |               | Depression (CDI)                            |                                       |
|                                                  |                                     |                                                                |               | Anxiety (STAIC-T)                           |                                       |
| Diehle et al. (2015)                             | TF-CBT (n = 23)                     | TAU/AT, Eye Movement Desensitization and Reprocessing (n = 25) | Efficacy      | PTSS (CAPS-CA)                              | Depression (RCADS-mdd)                |
|                                                  |                                     |                                                                |               | Depression (RCADS-mdd)                      | Anxiety (RCADS <sup>3</sup> )         |
|                                                  |                                     |                                                                |               | Anxiety (RCADS <sup>3</sup> )               |                                       |

|                                             |                                                                 |                                                               |               |                                                                   |                                 |
|---------------------------------------------|-----------------------------------------------------------------|---------------------------------------------------------------|---------------|-------------------------------------------------------------------|---------------------------------|
| Dorsey et al. (2020)                        | TF-CBT Group, Urban Kenya (n = 96)                              | TAU/AT (n = 96)                                               | Effectiveness | PTSS (CPSS)<br>Grief (ICG)                                        | PTSS (CPSS)                     |
|                                             | TF-CBT Group, Rural Kenya (n = 64)                              | TAU/AT (n = 64)                                               |               |                                                                   |                                 |
|                                             | TF-CBT Group, Urban Tanzania (n = 96)                           | TAU/AT (n = 96)                                               |               |                                                                   |                                 |
|                                             | TF-CBT Group, Rural Tanzania (n = 64)                           | TAU/AT (n = 64)                                               |               |                                                                   |                                 |
| Dorsey et al. (2014)                        | TF-CBT, outcome data merged for both TF-CBT conditions (n = 27) | -                                                             | Efficacy      | PTSS (UCLA)<br>Depression (CDI)                                   | PTSS (UCLA)                     |
| Goldbeck et al. (2016); Tutus et al. (2017) | TF-CBT (n = 76)                                                 | WL (n = 83)                                                   | Effectiveness | PTSS (CAPS-CA)<br>Depression (CDI)<br>Anxiety (SCARED)            | PTSS (UCLA)<br>Anxiety (SCARED) |
| Jaberghaderi et al. (2004)                  | TF-CBT (n = 7)                                                  | TAU/AT, Eye Movement Desensitization and Reprocessing (n = 7) | Efficacy      | PTSS (CROPS)                                                      | PTSS (PROPS)                    |
| Jensen et al. (2014); Jensen et al. (2017)  | TF-CBT (n = 59)                                                 | TAU/AT (n = 63)                                               | Effectiveness | PTSS (CPSS <sup>4</sup> )<br>Depression (MFQ)<br>Anxiety (SCARED) |                                 |
| King et al. (2000)                          | TF-CBT, child only (n = 12)                                     | WL (n = 12)                                                   | Efficacy      | PTSS (ADIS)<br>Depression (CDI)<br>Anxiety (R-CMAS)               |                                 |
|                                             | TF-CB, child and mother (n = 12)                                | WL (n = 12)                                                   |               |                                                                   |                                 |
| Langley et al. (2015)                       | TF-CBT Group, Bounce Back, immediate treatment (n = 35)         | WL (n = 36)                                                   | Effectiveness | PTSS (UCLA)<br>Depression (CDI)<br>Anxiety (SCARED)               | PTSS (UCLA)<br>Depression (CDI) |

|                                          |                                                                                                                                 |                                                             |               |                                                        |                                 |
|------------------------------------------|---------------------------------------------------------------------------------------------------------------------------------|-------------------------------------------------------------|---------------|--------------------------------------------------------|---------------------------------|
| McMullen et al. (2013)                   | TF-CBT Group,<br>Bounce Back, delayed<br>treatment (n = 34)<br>TF-CBT Group (n = 24)                                            | -<br>WL (n = 24)                                            | Effectiveness | PTSS (UCLA)                                            |                                 |
| Nixon et al. (2012); Nixon et al. (2017) | TF-CBT (n = 17)                                                                                                                 | TAU/AT, TF-CBT<br>without exposure (n =<br>16) <sup>5</sup> | Efficacy      | PTSS (CAPS-CA)<br>Depression (CDI)<br>Anxiety (R-CMAS) |                                 |
| O'Callaghan et al. (2015)                | TF-CBT Group (n = 26)                                                                                                           | TAU/AT, Child<br>Friendly Spaces (n =<br>24)                | Effectiveness | PTSS (UCLA)                                            |                                 |
| O'Callaghan et al. (2013)                | TF-CBT Group (n = 24)                                                                                                           | WL (n = 28)                                                 | Effectiveness | PTSS (UCLA)                                            |                                 |
| Salloum et al. (2015)                    | TF-CBT (n = 11)                                                                                                                 | - <sup>6</sup>                                              | Efficacy      | PTSS (UCLA)                                            |                                 |
| Santiago et al. (2018)                   | TF-CBT Group,<br>Bounce Back,<br>immediate treatment (n<br>= 25)<br>TF-CBT Group,<br>Bounce Back, delayed<br>treatment (n = 27) | WL (n = 27)                                                 | Effectiveness | PTSS (UCLA)<br>Depression (CDI)<br>Anxiety (SCARED)    | PTSS (UCLA)<br>Depression (CDI) |
| Schottelkorb et al. (2012)               | TF-CBT (n = 12)                                                                                                                 | TAU/AT, Child-<br>Centered Play<br>Therapy (n = 14)         | Effectiveness | PTSS (UCLA)                                            | PTSS (PROPS)                    |

*Note.* Sample size displayed for the respective PTSS measure. TF-CBT = Trauma-focused Cognitive Behavioral Therapy; TAU = Treatment as Usual; AT = Active treatment condition; WL = Wait-list condition; PTSS = Post-traumatic Stress Symptoms; UCLA = UCLA Posttraumatic Stress Disorder-Reaction Index; (S)MFQ = Mood and Feelings Questionnaire, (Short Version); SCARED = Screen for Child Anxiety Related Emotional Disorders; CPSS = Child PTSD Symptom Scale; BASC Dep = Behavioral Assessment System for Children, Depression subscale; Anx = Anxiety subscale; EGI-TG = Extended Grief Inventory-Traumatic Grief Subscales; K-SADS = K-SADS = Schedule for Affective Disorders and Schizophrenia

for School-Age Children; CDI = Children's Depression Inventory; STAIC-T = State-Trait Anxiety Inventory for Children, Trait subscale; TSCC-PTS = Trauma Symptom Checklist for Children, Post-traumatic Stress subscale; CESD-C = Center for Epidemiological Studies Depression Scale for Children; CAPS-CA = Clinician-Administered PTSD Scale for Children and Adolescents; RCADS-mdd = Revised Child Anxiety and Depression Scale, major depressive disorder subscale; ICG = Inventory of Complicated Grief; CROPS = Child Report of Post-traumatic Symptoms; PROPS = Parent Report of Post-traumatic Symptoms; ADIS = Anxiety Disorders Interview Schedule, Child version; R-CMAS = Revised Children's Manifest Anxiety Scale.

<sup>1</sup> Weighted mean and pooled standard deviation for subscales Reexperiencing, Avoidance, Hypervigilance.

<sup>2</sup> Community condition not included.

<sup>3</sup> Weighted mean and pooled standard deviation for subscales Separation Anxiety Disorder, Social Phobia, Panic Disorder, Generalized Anxiety Disorder.

<sup>4</sup> CPSS was preferred over CAPS-CA to allow for follow-up.

<sup>5</sup> TF-CBT without exposure component was regarded as active non-TF-CBT condition.

<sup>6</sup> SC-TF-CBT condition was excluded from analyses as some participants received TF-CBT while others did not.

**Table 7.***Overview of all Included Uncontrolled Studies*

| Author (year)                               | TF-CBT conditions (n)                             | Participant-reported Outcomes (Instruments)                           | Proxy-reported Outcomes (Instruments) |
|---------------------------------------------|---------------------------------------------------|-----------------------------------------------------------------------|---------------------------------------|
| Amaya-Jackson et al. (2018)                 | TF-CBT (n = 156)                                  | PTSS (UCLA)<br>Depression (CDI)                                       | PTSS (UCLA)                           |
| Cohen et al. (2006)                         | TF-CBT (n = 39)                                   | PTSS (CPSS)<br>Depression (MFQ)<br>Grief (EGI-TG)                     | PTSS (CPSS)                           |
| Cohen et al. (2004)                         | TF-CBT (n = 22)                                   | PTSS (CPSS)<br>Depression (MFQ)<br>Anxiety (SCARED)<br>Grief (EGI-TG) | PTSS (CPSS)                           |
| Espeleta et al. (2021)                      | TF-CBT (n = 99)                                   | PTSS (CPSS)<br>Depression (SMFQ)                                      | PTSS (CPSS)                           |
| Kirsch et al. (2011)                        | TF-CBT (n = 13)                                   | PTSS (CAPS-CA)<br>Depression (CDI)<br>Anxiety (SCARED)                | PTSS (UCLA)                           |
| Konanur et al. (2015)<br>Lang et al. (2015) | TF-CBT (n = 56)<br>TF-CBT (n = 188)               | PTSS (TSCC-PTS <sup>1</sup> )<br>PTSS (UCLA)<br>Depression (SMFQ)     | PTSS (TSCYC)                          |
| O'Donnel et al. (2014)                      | TF-CBT Group (n = 64)                             | PTSS (UCLA)<br>Depression (SMFQ)<br>Grief (GSS)                       | PTSS (UCLA)<br>Depression (SMFQ)      |
| Stewart et al. (2020)                       | TF-CBT, DSM-V (n = 26)<br>TF-CBT, DSM-IV (n = 41) | PTSS (CPSS)<br>PTSS (UCLA)<br>Depression (SMFQ)                       | PTSS (UCLA)<br>Depression (SMFQ)      |

|                               |                                             |                                                      |                                                      |
|-------------------------------|---------------------------------------------|------------------------------------------------------|------------------------------------------------------|
|                               | TF-CBT, DSM-V (n = 18)                      | PTSS (UCLA)<br>Depression (SMFQ)                     | PTSS (UCLA)<br>Depression (SMFQ)                     |
| Stewart et al. (2017)         | TF-CBT (n = 15)                             | PTSS (UCLA)<br>Depression (SMFQ)<br>Anxiety (SCARED) | PTSS (UCLA)<br>Depression (SMFQ)<br>Anxiety (SCARED) |
| Unterhitzberger et al. (2019) | TF-CBT (n = 26)                             | PTSS (CATS)<br>Depression (MFQ)                      | PTSS (CATS)<br>Depression (MFQ)                      |
| Webb et al. (2014)            | TF-CBT (n = 70)<br>TF-CBT Group USA (n = 4) | PTSS (UCLA)<br>PTSS (UCLA)<br>Depression (CDI)       |                                                      |

*Note.* Sample size displayed for the respective PTSS measure. TF-CBT = Trauma-focused Cognitive Behavioral Therapy; PTSS = Post-traumatic Stress Symptoms; UCLA = UCLA Posttraumatic Stress Disorder-Reaction Index; CDI = Children's Depression Inventory; CPSS = Child PTSD Symptom Scale; (S)MFQ = Mood and Feelings Questionnaire, (Short Version); EGI-TG = Extended Grief Inventory-Traumatic Grief Subscale; SCARED = Screen for Child Anxiety Related Emotional Disorders; TSCC-PTS = Trauma Symptom Checklist for Children, Post-traumatic Stress subscale; TSCYC-PTS = Trauma Symptom Checklist for Young Children, Post-traumatic Stress subscale; CATS = Child and Adolescent Trauma Screen.

<sup>1</sup> Standard Deviation for baseline (pre-therapy) retrieved from earlier assessment point (pre-assessment).

References

- Allen, B., Shenk, C. E., Dreschel, N. E., Wang, M., Bucher, A. M., Desir, M. P., . . . Grabowski, S. R. (2021). Integrating Animal-Assisted Therapy Into TF-CBT for Abused Youth With PTSD: A Randomized Controlled Feasibility Trial. *Child Maltreatment*. Advance online publication. <https://doi.org/10.1177/1077559520988790>
- Amaya-Jackson, L., Hagele, D., Sideris, J., Potter, D., Briggs, E. C., Keen, L., . . . Socolar, R. (2018). Pilot to policy: Statewide dissemination and implementation of evidence-based treatment for traumatized youth. *BMC Health Services Research, 18*(1), 589. <https://doi.org/10.1186/s12913-018-3395-0>
- Brown, E. J., Goodman, R. F., Cohen, J. A., Mannarino, A. P., & Chaplin, W. F. (2020). An Exploratory Trial of Cognitive-Behavioral vs Client-Centered Therapies for Child-Mother Dyads Bereaved from Terrorism. *Journal of Child & Adolescent Trauma, 13*(1), 113–125. <https://doi.org/10.1007/s40653-019-00264-2>
- Cohen, J. A., Deblinger, E., Mannarino, A. P., & Steer, R. A. (2004). A multisite, randomized controlled trial for children with sexual abuse-related PTSD symptoms. *Journal of the American Academy of Child and Adolescent Psychiatry, 43*(4), 393–402. <https://doi.org/10.1097/00004583-200404000-00005>
- Cohen, J. A., & Mannarino, A. P. (1998). Interventions for Sexually abused Children: Initial Treatment Outcome Findings. *Child Maltreatment, 3*(1), 17–26. <https://doi.org/10.1177/1077559598003001002>

- Cohen, J. A., Mannarino, A. P., & Knudsen, K. (2004). Treating childhood traumatic grief: A pilot study. *Journal of the American Academy of Child and Adolescent Psychiatry, 43*(10), 1225–1233. <https://doi.org/10.1097/01.chi.0000135620.15522.38>
- Cohen, J. A., Mannarino, A. P., & Knudsen, K. (2005). Treating sexually abused children: 1 year follow-up of a randomized controlled trial. *Child Abuse & Neglect, 29*(2), 135–145. <https://doi.org/10.1016/j.chiabu.2004.12.005>
- Cohen, J. A., Mannarino, A. P., & Staron, V. R. (2006). A pilot study of modified cognitive-behavioral therapy for childhood traumatic grief (CBT-CTG). *Journal of the American Academy of Child and Adolescent Psychiatry, 45*(12), 1465–1473. <https://doi.org/10.1097/01.chi.0000237705.43260.2c>
- Davidson, T. M., Bunnell, B. E., Saunders, B. E., Hanson, R. F., Danielson, C. K., Cook, D., . . . Ruggiero, K. J. (2019). Pilot Evaluation of a Tablet-Based Application to Improve Quality of Care in Child Mental Health Treatment. *Behavior Therapy, 50*(2), 367–379. <https://doi.org/10.1016/j.beth.2018.07.005>
- Deblinger, E., Lippmann, J., & Steer, R. (1996). Sexually Abused Children Suffering Posttraumatic Stress Symptoms: Initial Treatment Outcome Findings. *Child Maltreatment, 1*(4), 310–321. <https://doi.org/10.1177/1077559596001004003>
- Deblinger, E., Mannarino, A. P., Cohen, J. A., & Steer, R. A. (2006). A follow-up study of a multisite, randomized, controlled trial for children with sexual abuse-related PTSD symptoms. *Journal of the American Academy of Child and Adolescent Psychiatry, 45*(12), 1474–1484. <https://doi.org/10.1097/01.chi.0000240839.56114.bb>



- Deblinger, E., Steer, R. A., & Lippmann, J. (1999). Two-year follow-up study of cognitive behavioral therapy for sexually abused children suffering post-traumatic stress symptoms. *Child Abuse & Neglect*, *23*(12), 1371–1378. [https://doi.org/10.1016/S0145-2134\(99\)00091-5](https://doi.org/10.1016/S0145-2134(99)00091-5)
- Diehle, J., Opmeer, B. C., Boer, F., Mannarino, A. P., & Lindauer, R. J. L. (2015). Trauma-focused cognitive behavioral therapy or eye movement desensitization and reprocessing: What works in children with posttraumatic stress symptoms? A randomized controlled trial. *European Child & Adolescent Psychiatry*, *24*(2), 227–236. <https://doi.org/10.1007/s00787-014-0572-5>
- Dorsey, S., Lucid, L., Martin, P., King, K. M., O'Donnell, K., Murray, L. K., . . . Whetten, K. (2020). Effectiveness of Task-Shifted Trauma-Focused Cognitive Behavioral Therapy for Children Who Experienced Parental Death and Posttraumatic Stress in Kenya and Tanzania: A Randomized Clinical Trial. *JAMA Psychiatry*, *77*(5), 464–473. <https://doi.org/10.1001/jamapsychiatry.2019.4475>
- Dorsey, S., Pullmann, M. D., Berliner, L., Koschmann, E., McKay, M., & Deblinger, E. (2014). Engaging foster parents in treatment: A randomized trial of supplementing trauma-focused cognitive behavioral therapy with evidence-based engagement strategies. *Child Abuse & Neglect*, *38*(9), 1508–1520. <https://doi.org/10.1016/j.chiabu.2014.03.020>
- Espeleta, H. C., Peer, S. O., Are, F., & Hanson, R. F. (2021). Therapists' Perceived Competence in Trauma-Focused Cognitive Behavioral Therapy and Client Outcomes: Findings From a Community-Based Learning Collaborative. *Child Maltreatment*, 10775595211003673. <https://doi.org/10.1177/10775595211003673>

- Goldbeck, L., Muche, R., Sachser, C., Tutus, D., & Rosner, R. (2016). Effectiveness of Trauma-Focused Cognitive Behavioral Therapy for Children and Adolescents: A Randomized Controlled Trial in Eight German Mental Health Clinics. *Psychotherapy and Psychosomatics*, *85*(3), 159–170. <https://doi.org/10.1159/000442824>
- Jaberghaderi, N., Greenwald, R., Rubin, A., Zand, S. O., & Dolatabadi, S. (2004). A comparison of CBT and EMDR for sexually-abused Iranian girls. *Clinical Psychology & Psychotherapy*, *11*(5), 358–368. <https://doi.org/10.1002/cpp.395>
- Jensen, T. K., Holt, T., & Ormhaug, S. M. (2017). A Follow-Up Study from a Multisite, Randomized Controlled Trial for Traumatized Children Receiving TF-CBT. *Journal of Abnormal Child Psychology*, *45*(8), 1587–1597. <https://doi.org/10.1007/s10802-017-0270-0>
- Jensen, T. K., Holt, T., Ormhaug, S. M., Egeland, K., Granly, L., Hoaas, L. C., . . . Wentzel-Larsen, T. (2014). A randomized effectiveness study comparing trauma-focused cognitive behavioral therapy with therapy as usual for youth. *Journal of Clinical Child and Adolescent Psychology : The Official Journal for the Society of Clinical Child and Adolescent Psychology, American Psychological Association, Division 53*, *43*(3), 356–369. <https://doi.org/10.1080/15374416.2013.822307>
- King, N. J., Tonge, B. J., Mullen, P., Myerson, N., Heyne, D., Rollings, S., . . . Ollendick, T. H. (2000). Treating sexually abused children with posttraumatic stress symptoms: A randomized clinical trial. *Journal of the American Academy of Child and Adolescent Psychiatry*, *39*(11), 1347–1355. <https://doi.org/10.1097/00004583-200011000-00008>
- Kirsch, V., Fegert, J. M., Seitz, D. C. M., & Goldbeck, L. (2011). Traumafokussierte kognitive Verhaltenstherapie (Tf-KVT) bei Kindern und Jugendlichen nach Missbrauch und Misshandlung. *Kindheit Und Entwicklung*, *20*(2), 95–102. <https://doi.org/10.1026/0942-5403/a000045>

- Konanur, S., Muller, R. T., Cinamon, J. S., Thornback, K., & Zorzella, K. P. M. (2015). Effectiveness of Trauma-Focused Cognitive Behavioral Therapy in a community-based program. *Child Abuse & Neglect*, *50*, 159–170. <https://doi.org/10.1016/j.chiabu.2015.07.013>
- Lang, J. M., Franks, R. P., Epstein, C., Stover, C., & Oliver, J. A. (2015). Statewide dissemination of an evidence-based practice using Breakthrough Series Collaboratives. *Children and Youth Services Review*, *55*, 201–209. <https://doi.org/10.1016/j.childyouth.2015.06.005>
- Langley, A. K., Gonzalez, A., Sugar, C. A., Solis, D., & Jaycox, L. (2015). Bounce back: Effectiveness of an elementary school-based intervention for multicultural children exposed to traumatic events. *Journal of Consulting and Clinical Psychology*, *83*(5), 853–865. <https://doi.org/10.1037/ccp0000051>
- McMullen, J., O'Callaghan, P., Shannon, C., Black, A., & Eakin, J. (2013). Group trauma-focused cognitive-behavioural therapy with former child soldiers and other war-affected boys in the DR Congo: A randomised controlled trial. *Journal of Child Psychology and Psychiatry, and Allied Disciplines*, *54*(11), 1231–1241. <https://doi.org/10.1111/jcpp.12094>
- Nixon, R., Sterk, J., & Pearce, A. (2012). A randomized trial of cognitive behaviour therapy and cognitive therapy for children with posttraumatic stress disorder following single-incident trauma. *Journal of Abnormal Child Psychology*, *40*(3), 327–337. <https://doi.org/10.1007/s10802-011-9566-7>
- Nixon, R., Sterk, J., Pearce, A., & Weber, N. (2017). A randomized trial of cognitive behavior therapy and cognitive therapy for children with posttraumatic stress disorder following single-incident trauma: Predictors and outcome at 1-year follow-up. *Psychological Trauma : Theory, Research, Practice and Policy*, *9*(4), 471–478. <https://doi.org/10.1037/tra0000190>

- O'Callaghan, P., McMullen, J., Shannon, C., & Rafferty, H. (2015). Comparing a trauma focused and non trauma focused intervention with war affected Congolese youth. *Intervention, 13*(1), 28–44. <https://doi.org/10.1097/WTF.0000000000000054>
- O'Callaghan, P., McMullen, J., Shannon, C., Rafferty, H., & Black, A. (2013). A randomized controlled trial of trauma-focused cognitive behavioral therapy for sexually exploited, war-affected Congolese girls. *Journal of the American Academy of Child and Adolescent Psychiatry, 52*(4), 359–369. <https://doi.org/10.1016/j.jaac.2013.01.013>
- O'Donnell, K., Dorsey, S., Gong, W., Ostermann, J., Whetten, R., Cohen, J. A., . . . Whetten, K. (2014). Treating maladaptive grief and posttraumatic stress symptoms in orphaned children in Tanzania: Group-based trauma-focused cognitive-behavioral therapy. *Journal of Traumatic Stress, 27*(6), 664–671. <https://doi.org/10.1002/jts.21970>
- Salloum, A., Small, B. J., Robst, J., Scheeringa, M. S., Cohen, J. A., & Storch, E. A. (2015). Stepped and Standard Care for Childhood Trauma. *Research on Social Work Practice, 27*(6), 653–663. <https://doi.org/10.1177/1049731515601898>
- Santiago, C. D., Raviv, T., Ros, A. M., Brewer, S. K., Distel, L. M. L., Torres, S. A., . . . Langley, A. K. (2018). Implementing the Bounce Back trauma intervention in urban elementary schools: A real-world replication trial. *School Psychology Quarterly : The Official Journal of the Division of School Psychology, American Psychological Association, 33*(1), 1–9. <https://doi.org/10.1037/spq0000229>
- Schottelkorb, A. A., Dumas, D. M., & Garcia, R. (2012). Treatment for childhood refugee trauma: A randomized, controlled trial. *International Journal of Play Therapy, 21*(2), 57–73. <https://doi.org/10.1037/a0027430>

- Stewart, R. W., Orengo-Aguayo, R. E., Cohen, J. A., Mannarino, A. P., & Arellano, M. A. de (2017). A Pilot Study of Trauma-Focused Cognitive-Behavioral Therapy Delivered via Telehealth Technology. *Child Maltreatment, 22*(4), 324–333. <https://doi.org/10.1177/1077559517725403>
- Stewart, R. W., Orengo-Aguayo, R., Young, J., Wallace, M. M., Cohen, J. A., Mannarino, A. P., & Arellano, M. A. de (2020). Feasibility and effectiveness of a telehealth service delivery model for treating childhood posttraumatic stress: A community-based, open pilot trial of trauma-focused cognitive-behavioral therapy. *Journal of Psychotherapy Integration, 30*(2), 274–289. <https://doi.org/10.1037/int0000225>
- Tutus, D., Pfeiffer, E., Rosner, R., Sachser, C., & Goldbeck, L. (2017). Sustainability of Treatment Effects of Trauma-Focused Cognitive-Behavioral Therapy for Children and Adolescents: Findings from 6- and 12-Month Follow-Ups. *Psychotherapy and Psychosomatics, 86*(6), 379–381. <https://doi.org/10.1159/000481198>
- Unterhitzberger, J., Wintersohl, S., Lang, M., König, J., & Rosner, R. (2019). Providing manualized individual trauma-focused CBT to unaccompanied refugee minors with uncertain residence status: A pilot study. *Child and Adolescent Psychiatry and Mental Health, 13*, 22. <https://doi.org/10.1186/s13034-019-0282-3>
- Webb, C., Hayes, A., Grasso, D., Laurenceau, J.-P., & Deblinger, E. (2014). Trauma-Focused Cognitive Behavioral Therapy for Youth: Effectiveness in a Community Setting. *Psychological Trauma : Theory, Research, Practice and Policy, 6*(5), 555–562. <https://doi.org/10.1037/a0037364>

# Child Maltreatment

**Table 8.**  
PTSS Pre-FU III Within-Group Effect Size.

| Study                                               | Condition                 | Outcome | Statistics for each study |                |          |             |             |         | Hedges's g and 95% CI |
|-----------------------------------------------------|---------------------------|---------|---------------------------|----------------|----------|-------------|-------------|---------|-----------------------|
|                                                     |                           |         | Hedges's g                | Standard error | Variance | Lower limit | Upper limit | Z-Value |                       |
| Brown et al. 2020                                   | TF-CBT                    | PTSS    | 0.077                     | 0.363          | 0.132    | -0.635      | 0.788       | 0.211   | 0.833                 |
| Cohen et al. 1998; 2005                             | TF-CBT                    | PTSS    | 0.717                     | 0.189          | 0.036    | 0.347       | 1.088       | 3.797   | 0.000                 |
| Cohen, Deblinger et al. 2004; Deblinger et al. 2006 | TF-CBT                    | PTSS    | 2.374                     | 0.239          | 0.057    | 1.896       | 2.842       | 8.945   | 0.000                 |
| Deblinger et al. 1996; 1999                         | TF-CBT                    | PTSS    | 1.566                     | 0.351          | 0.123    | 0.979       | 2.253       | 4.466   | 0.000                 |
| Deblinger et al. 1996; 1999                         | TF-CBT (child only)       | PTSS    | 2.299                     | 0.474          | 0.225    | 1.369       | 3.228       | 4.848   | 0.000                 |
| Dorsey et al. 2020                                  | TF-CBT (mother and child) | PTSS    | 2.773                     | 0.250          | 0.063    | 1.683       | 3.863       | 8.697   | 0.000                 |
| Dorsey et al. 2020                                  | TF-CBT group (KR)         | PTSS    | 2.215                     | 0.207          | 0.043    | 1.808       | 2.621       | 10.685  | 0.000                 |
| Dorsey et al. 2020                                  | TF-CBT group (KU)         | PTSS    | 2.594                     | 0.285          | 0.081    | 1.935       | 3.153       | 8.093   | 0.000                 |
| Dorsey et al. 2020                                  | TF-CBT group (TR)         | PTSS    | 2.594                     | 0.285          | 0.081    | 1.935       | 3.153       | 8.093   | 0.000                 |
| Dorsey et al. 2020                                  | TF-CBT group (TU)         | PTSS    | 2.542                     | 0.258          | 0.066    | 2.437       | 3.447       | 11.417  | 0.000                 |
| Goldbeck et al. 2016; Tutus et al. 2017             | TF-CBT                    | PTSS    | 1.455                     | 0.165          | 0.027    | 1.132       | 1.778       | 8.631   | 0.000                 |
| Jensen et al. 2014, 2017                            | TF-CBT                    | PTSS    | 1.681                     | 0.253          | 0.064    | 1.165       | 2.157       | 6.589   | 0.000                 |
| Nixon et al. 2012, 2017                             | TF-CBT                    | PTSS    | 3.520                     | 0.516          | 0.262    | 0.319       | 4.320       | 6.363   | 0.000                 |
| O'Donnell et al. 2014                               | TF-CBT group              | PTSS    | 2.658                     | 0.298          | 0.089    | 2.075       | 3.242       | 8.926   | 0.000                 |
| Webb et al., 2014                                   | TF-CBT                    | PTSS    | 1.342                     | 0.185          | 0.034    | 0.890       | 1.704       | 7.263   | 0.000                 |
|                                                     |                           |         | 1.831                     | 0.211          | 0.044    | 1.515       | 2.345       | 9.154   | 0.000                 |

KR = Kenia Rural; KU = Kenia Urban; TR = Tanzania Rural; TU = Tanzania Urban.

**Table 9.**  
Depression Pre-FU III Within-Group Effect Size.

| Study name                                          | Condition                 | Outcome    | Statistics for each study |                |          |             |             |         | Hedges's g and 95% CI |
|-----------------------------------------------------|---------------------------|------------|---------------------------|----------------|----------|-------------|-------------|---------|-----------------------|
|                                                     |                           |            | Hedges's g                | Standard error | Variance | Lower limit | Upper limit | Z-Value |                       |
| Brown et al. 2020                                   | TF-CBT                    | Depression | 0.504                     | 0.426          | 0.181    | -0.331      | 1.339       | 1.183   | 0.237                 |
| Cohen et al. 1998; 2005                             | TF-CBT                    | Depression | 0.422                     | 0.175          | 0.031    | 0.078       | 0.769       | 2.406   | 0.016                 |
| Cohen, Deblinger et al. 2004; Deblinger et al. 2006 | TF-CBT                    | Depression | 0.865                     | 0.141          | 0.020    | 0.589       | 1.141       | 6.140   | 0.000                 |
| Deblinger et al. 1996; 1999                         | TF-CBT (child only)       | Depression | 1.111                     | 0.297          | 0.088    | 0.524       | 1.892       | 3.741   | 0.000                 |
| Deblinger et al. 1996; 1999                         | TF-CBT (mother and child) | Depression | 0.702                     | 0.271          | 0.073    | 0.170       | 1.233       | 2.589   | 0.010                 |
| Goldbeck et al. 2016; Tutus et al. 2017             | TF-CBT                    | Depression | 0.672                     | 0.119          | 0.012    | 0.434       | 0.910       | 5.681   | 0.000                 |
| Jensen et al. 2014, 2017                            | TF-CBT                    | Depression | 1.312                     | 0.205          | 0.042    | 0.930       | 1.834       | 6.981   | 0.000                 |
| Nixon et al. 2012, 2017                             | TF-CBT                    | Depression | 1.787                     | 0.386          | 0.148    | 1.030       | 2.500       | 4.631   | 0.000                 |
| O'Donnell et al. 2014                               | TF-CBT group              | Depression | 1.639                     | 0.214          | 0.046    | 1.220       | 2.057       | 7.574   | 0.000                 |
|                                                     |                           |            | 0.994                     | 0.152          | 0.023    | 0.697       | 1.292       | 6.552   | 0.000                 |

**Table 10.**  
Anxiety Pre-FU III Within-Group Effect Size.

| Study name                                          | Condition | Outcome | Statistics for each study |                |          |             |             |         | Hedges's g and 95% CI |
|-----------------------------------------------------|-----------|---------|---------------------------|----------------|----------|-------------|-------------|---------|-----------------------|
|                                                     |           |         | Hedges's g                | Standard error | Variance | Lower limit | Upper limit | Z-Value |                       |
| Brown et al. 2020                                   | TF-CBT    | Anxiety | -0.034                    | 0.362          | 0.131    | -0.743      | 0.675       | -0.094  | 0.925                 |
| Cohen et al. 1998; 2005                             | TF-CBT    | Anxiety | 0.575                     | 0.182          | 0.033    | 0.219       | 0.932       | 3.167   | 0.002                 |
| Cohen, Deblinger et al. 2004; Deblinger et al. 2006 | TF-CBT    | Anxiety | 1.214                     | 0.159          | 0.025    | 0.903       | 1.525       | 7.655   | 0.000                 |
| Deblinger et al. 1996; 1999                         | TF-CBT    | Anxiety | 0.754                     | 0.128          | 0.016    | 0.504       | 1.005       | 5.902   | 0.000                 |
| Goldbeck et al. 2016; Tutus et al. 2017             | TF-CBT    | Anxiety | 0.996                     | 0.181          | 0.033    | 0.642       | 1.350       | 5.514   | 0.000                 |
| Jensen et al. 2014, 2017                            | TF-CBT    | Anxiety | 0.917                     | 0.451          | 0.203    | 1.724       | 1.850       | 8.907   | 0.000                 |
| Nixon et al. 2012, 2017                             | TF-CBT    | Anxiety | 0.949                     | 0.202          | 0.041    | 0.552       | 1.345       | 4.689   | 0.000                 |

**Table 11.**  
Grief Pre-FU III Within-Group Effect Size.

| Study name            | Condition         | Outcome | Statistics for each study |                |          |             |             |         | Hedges's g and 95% CI |
|-----------------------|-------------------|---------|---------------------------|----------------|----------|-------------|-------------|---------|-----------------------|
|                       |                   |         | Hedges's g                | Standard error | Variance | Lower limit | Upper limit | Z-Value |                       |
| Brown et al. 2020     | TF-CBT            | Grief   | 0.173                     | 0.370          | 0.137    | -0.551      | 0.898       | 0.469   | 0.639                 |
| Dorsey et al. 2020    | TF-CBT group (KR) | Grief   | 1.683                     | 0.212          | 0.045    | 1.268       | 2.098       | 7.947   | 0.000                 |
| Dorsey et al. 2020    | TF-CBT group (KU) | Grief   | 1.682                     | 0.173          | 0.030    | 1.343       | 2.021       | 9.713   | 0.000                 |
| Dorsey et al. 2020    | TF-CBT group (TR) | Grief   | 1.976                     | 0.234          | 0.055    | 1.517       | 2.435       | 8.433   | 0.000                 |
| Dorsey et al. 2020    | TF-CBT group (TU) | Grief   | 2.205                     | 0.207          | 0.043    | 1.800       | 2.610       | 10.773  | 0.000                 |
| O'Donnell et al. 2014 | TF-CBT group      | Grief   | 2.352                     | 0.271          | 0.074    | 1.820       | 2.884       | 8.670   | 0.000                 |
|                       |                   |         | 1.730                     | 0.227          | 0.052    | 1.265       | 2.175       | 7.621   | 0.000                 |

KR = Kenia Rural; KU = Kenia Urban; TR = Tanzania Rural; TU = Tanzania Urban.

**Table 12.**  
PTSS FU II-FU III Within-Group Effect Size.

| Study name                                          | Condition                 | Outcome | Statistics for each study |                |          |             |             |         | Hedges's g and 95% CI |
|-----------------------------------------------------|---------------------------|---------|---------------------------|----------------|----------|-------------|-------------|---------|-----------------------|
|                                                     |                           |         | Hedges's g                | Standard error | Variance | Lower limit | Upper limit | Z-Value |                       |
| Brown et al. 2020                                   | TF-CBT                    | PTSS    | 0.115                     | 0.365          | 0.133    | -0.614      | 0.813       | 0.316   | 0.752                 |
| Cohen et al. 1998; 2005                             | TF-CBT                    | PTSS    | 0.118                     | 0.168          | 0.028    | -0.212      | 0.449       | 0.703   | 0.482                 |
| Cohen, Deblinger et al. 2004; Deblinger et al. 2006 | TF-CBT                    | PTSS    | 0.314                     | 0.120          | 0.014    | -0.221      | 0.249       | 0.119   | 0.913                 |
| Deblinger et al. 1996; 1999                         | TF-CBT (child only)       | PTSS    | 0.296                     | 0.235          | 0.055    | -0.166      | 0.757       | 1.256   | 0.209                 |
| Deblinger et al. 1996; 1999                         | TF-CBT (mother and child) | PTSS    | 0.124                     | 0.242          | 0.059    | -0.062      | 0.569       | 0.632   | 0.527                 |
| Dorsey et al. 2020                                  | TF-CBT                    | PTSS    | 2.035                     | 0.207          | 0.043    | 1.800       | 2.610       | 10.773  | 0.000                 |
| Goldbeck et al. 2016; Tutus et al. 2017             | TF-CBT                    | PTSS    | 0.476                     | 0.268          | 0.072    | -0.050      | 1.002       | 1.774   | 0.076                 |
| Nixon et al. 2012; 2017                             | TF-CBT                    | PTSS    | 0.189                     | 0.065          | 0.004    | -0.071      | 0.527       | 3.045   | 0.002                 |

**Table 13.**  
Depression FU II-FU III Within-Group Effect Size.

| Study name                                          | Condition                 | Outcome    | Statistics for each study |                |          |             |             |         | Hedges's g and 95% CI |
|-----------------------------------------------------|---------------------------|------------|---------------------------|----------------|----------|-------------|-------------|---------|-----------------------|
|                                                     |                           |            | Hedges's g                | Standard error | Variance | Lower limit | Upper limit | Z-Value |                       |
| Brown et al. 2020                                   | TF-CBT                    | Depression | 0.100                     | 0.364          | 0.133    | -0.614      | 0.813       | 0.273   | 0.785                 |
| Cohen et al. 1998; 2005                             | TF-CBT                    | Depression | 0.045                     | 0.168          | 0.028    | -0.284      | 0.374       | 0.268   | 0.789                 |
| Cohen, Deblinger et al. 2004; Deblinger et al. 2006 | TF-CBT                    | Depression | 0.113                     | 0.120          | 0.014    | -0.221      | 0.249       | 0.119   | 0.913                 |
| Deblinger et al. 1996; 1999                         | TF-CBT (child only)       | Depression | 0.013                     | 0.230          | 0.053    | -0.437      | 0.464       | 0.059   | 0.953                 |
| Deblinger et al. 1996; 1999                         | TF-CBT (mother and child) | Depression | 0.124                     | 0.242          | 0.059    | -0.062      | 0.569       | 0.632   | 0.527                 |
| Dorsey et al. 2020                                  | TF-CBT                    | Depression | 0.053                     | 0.101          | 0.010    | -0.104      | 0.281       | 0.927   | 0.354                 |
| Goldbeck et al. 2016; Tutus et al. 2017             | TF-CBT                    | Depression | 0.534                     | 0.272          | 0.074    | 0.000       | 1.067       | 1.960   | 0.050                 |
| Nixon et al. 2012; 2017                             | TF-CBT                    | Depression | 0.085                     | 0.062          | 0.004    | -0.037      | 0.206       | 1.359   | 0.171                 |

**Table 14.**  
Anxiety FU II-FU III Within-Group Effect Size.

| Study name                                          | Condition                 | Outcome | Statistics for each study |                |          |             |             |         | Hedges's g and 95% CI |
|-----------------------------------------------------|---------------------------|---------|---------------------------|----------------|----------|-------------|-------------|---------|-----------------------|
|                                                     |                           |         | Hedges's g                | Standard error | Variance | Lower limit | Upper limit | Z-Value |                       |
| Brown et al. 2020                                   | TF-CBT                    | Anxiety | -0.512                    | 0.428          | 0.183    | -1.350      | 0.327       | -1.196  | 0.232                 |
| Cohen et al. 1998; 2005                             | TF-CBT                    | Anxiety | 0.103                     | 0.168          | 0.028    | -0.284      | 0.374       | 0.173   | 0.869                 |
| Cohen, Deblinger et al. 2004; Deblinger et al. 2006 | TF-CBT                    | Anxiety | 0.149                     | 0.121          | 0.015    | -0.087      | 0.385       | 1.297   | 0.216                 |
| Deblinger et al. 1996; 1999                         | TF-CBT (child only)       | Anxiety | 0.128                     | 0.113          | 0.012    | -0.066      | 0.287       | 1.114   | 0.262                 |
| Deblinger et al. 1996; 1999                         | TF-CBT (mother and child) | Anxiety | 0.400                     | 0.262          | 0.070    | -0.117      | 0.917       | 1.515   | 0.130                 |
| Goldbeck et al. 2016; Tutus et al. 2017             | TF-CBT                    | Anxiety | 0.119                     | 0.070          | 0.005    | -0.019      | 0.257       | 1.695   | 0.090                 |
| Nixon et al. 2012; 2017                             | TF-CBT                    | Anxiety |                           |                |          |             |             |         |                       |

# Child Maltreatment

**Table 15.**  
PTSS Pre-Post Proxy-Reported Within-Group Effect Size.

| Study name                              | Condition                             | Outcome | Statistics for each study |                |          |             |             |         | Hedges's g and 95% CI |
|-----------------------------------------|---------------------------------------|---------|---------------------------|----------------|----------|-------------|-------------|---------|-----------------------|
|                                         |                                       |         | Hedges's g                | Standard error | Variance | Lower limit | Upper limit | Z-Value |                       |
| Allen et al., 2021                      | TF-CBT                                | PTSS    | 1.554                     | 0.398          | 0.158    | 0.775       | 2.334       | 3.908   | 0.000                 |
| Allen et al., 2021                      | TF-CBT (+ AAT)                        | PTSS    | 1.145                     | 0.332          | 0.110    | 0.494       | 1.796       | 3.448   | 0.001                 |
| Amaya-Jackson et al. 2018               | TF-CBT                                | PTSS    | 0.874                     | 0.103          | 0.011    | 0.672       | 1.075       | 8.605   | 0.000                 |
| Cohen et al. 2006                       | TF-CBT                                | PTSS    | 0.512                     | 0.176          | 0.031    | 0.167       | 0.858       | 2.907   | 0.004                 |
| Cohen, Mannarino et al., 2004           | TF-CBT                                | PTSS    | 1.654                     | 0.323          | 0.104    | 1.021       | 2.288       | 5.119   | 0.000                 |
| Davidson et al. 2016                    | TF-CBT                                | PTSS    | 0.368                     | 0.135          | 0.046    | 0.973       | 0.687       | 0.492   | 0.626                 |
| Davidson et al. 2018                    | TF-CBT (+ tablet)                     | PTSS    | 0.550                     | 0.273          | 0.075    | 0.014       | 0.086       | 2.013   | 0.044                 |
| Dorsey et al. 2014                      | TF-CBT                                | PTSS    | 0.963                     | 0.238          | 0.056    | 0.497       | 1.429       | 4.052   | 0.000                 |
| Dorsey et al. 2020                      | TF-CBT group (KR)                     | PTSS    | 1.969                     | 0.234          | 0.055    | 1.511       | 2.428       | 8.423   | 0.000                 |
| Dorsey et al. 2020                      | TF-CBT group (KU)                     | PTSS    | 2.054                     | 0.197          | 0.039    | 1.689       | 2.439       | 10.445  | 0.000                 |
| Dorsey et al. 2020                      | TF-CBT group (TR)                     | PTSS    | 2.307                     | 0.261          | 0.068    | 1.795       | 2.818       | 8.834   | 0.000                 |
| Dorsey et al. 2020                      | TF-CBT group (TU)                     | PTSS    | 2.125                     | 0.201          | 0.041    | 1.730       | 2.519       | 10.556  | 0.000                 |
| Goldbeck et al. 2016; Tutus et al. 2017 | TF-CBT                                | PTSS    | 0.740                     | 0.151          | 0.023    | 0.444       | 1.036       | 4.902   | 0.000                 |
| Jaherghaderi et al. 2004                | TF-CBT                                | PTSS    | 1.087                     | 0.481          | 0.231    | 0.465       | 0.699       | 2.982   | 0.024                 |
| Kirsch et al., 2011                     | TF-CBT                                | PTSS    | 0.559                     | 0.265          | 0.070    | 0.041       | 1.078       | 2.114   | 0.035                 |
| Konaniur et al. 2015                    | TF-CBT                                | PTSS    | 0.281                     | 0.154          | 0.024    | -0.021      | 0.583       | 1.821   | 0.069                 |
| Lang et al. 2015                        | TF-CBT                                | PTSS    | 0.543                     | 0.079          | 0.006    | 0.387       | 0.698       | 6.640   | 0.000                 |
| Langley et al. 2015                     | TF-CBT group (Bounce Back, delayed)   | PTSS    | 0.770                     | 0.192          | 0.037    | 0.394       | 1.146       | 4.015   | 0.000                 |
| Langley et al. 2015                     | TF-CBT group (Bounce Back, immediate) | PTSS    | 0.602                     | 0.197          | 0.039    | 0.215       | 0.989       | 3.049   | 0.002                 |
| O'Donnel et al. 2014                    | TF-CBT group                          | PTSS    | 1.200                     | 0.184          | 0.034    | 0.839       | 1.561       | 6.519   | 0.000                 |
| Santiago et al. 2018                    | TF-CBT group (Bounce Back, delayed)   | PTSS    | -0.109                    | 0.187          | 0.035    | -0.476      | 0.258       | -0.581  | 0.561                 |
| Santiago et al. 2018                    | TF-CBT group (Bounce Back, immediate) | PTSS    | 0.200                     | 0.214          | 0.046    | -0.220      | 0.620       | 0.933   | 0.351                 |
| Schottelkorb et al. 2012                | TF-CBT                                | PTSS    | 0.040                     | 0.305          | 0.093    | -0.558      | 0.638       | 0.131   | 0.896                 |
| Stewart et al. 2017                     | TF-CBT                                | PTSS    | 1.640                     | 0.399          | 0.159    | 0.858       | 2.422       | 4.109   | 0.000                 |
| Stewart et al. 2020                     | TF-CBT (DSM-IV)                       | PTSS    | 1.479                     | 0.236          | 0.055    | 1.018       | 1.941       | 6.280   | 0.000                 |
| Stewart et al. 2020                     | TF-CBT (DSM-V)                        | PTSS    | 1.407                     | 0.334          | 0.112    | 0.752       | 2.061       | 4.212   | 0.000                 |
| Unterhitzinger et al. 2019              | TF-CBT                                | PTSS    | 1.367                     | 0.294          | 0.087    | 0.790       | 1.943       | 4.647   | 0.000                 |
| Espeleta et al. 2021                    | TF-CBT                                | PTSS    | 1.091                     | 0.127          | 0.016    | 0.842       | 1.339       | 8.591   | 0.000                 |
|                                         |                                       |         | 1.014                     | 0.115          | 0.013    | 0.789       | 1.239       | 8.838   | 0.000                 |

AAT = Animal-Assisted Therapy; KR = Kenia Rural; KU = Kenia Urban; TR = Tanzania Rural; TU = Tanzania Urban.

**Table 16.**  
Depression Pre-Post Proxy-Reported Within-Group Effect Size.

| Study name                 | Condition                             | Outcome    | Statistics for each study |                |          |             |             |         | Hedges's g and 95% CI |
|----------------------------|---------------------------------------|------------|---------------------------|----------------|----------|-------------|-------------|---------|-----------------------|
|                            |                                       |            | Hedges's g                | Standard error | Variance | Lower limit | Upper limit | Z-Value |                       |
| Diehle et al. 2015         | TF-CBT                                | Depression | 0.876                     | 0.367          | 0.135    | 0.157       | 1.596       | 2.387   | 0.017                 |
| Lang et al. 2015           | TF-CBT                                | Depression | 0.546                     | 0.087          | 0.008    | 0.375       | 0.717       | 6.246   | 0.000                 |
| Langley et al. 2015        | TF-CBT group (Bounce Back, delayed)   | Depression | 0.414                     | 0.175          | 0.031    | 0.071       | 0.756       | 2.364   | 0.018                 |
| Langley et al. 2015        | TF-CBT group (Bounce Back, immediate) | Depression | 0.396                     | 0.185          | 0.034    | -0.067      | 0.635       | 1.967   | 0.110                 |
| O'Donnel et al. 2014       | TF-CBT group                          | Depression | 0.849                     | 0.158          | 0.025    | 0.539       | 1.159       | 5.363   | 0.000                 |
| Santiago et al. 2018       | TF-CBT group (Bounce Back, delayed)   | Depression | 0.456                     | 0.197          | 0.039    | 0.071       | 0.843       | 2.918   | 0.020                 |
| Santiago et al. 2018       | TF-CBT group (Bounce Back, immediate) | Depression | 0.207                     | 0.215          | 0.046    | -0.214      | 0.627       | 0.904   | 0.359                 |
| Stewart et al. 2017        | TF-CBT                                | Depression | 0.717                     | 0.286          | 0.082    | 0.157       | 1.277       | 2.509   | 0.012                 |
| Stewart et al. 2020        | TF-CBT                                | Depression | 0.866                     | 0.161          | 0.026    | 0.551       | 1.181       | 5.384   | 0.000                 |
| Unterhitzinger et al. 2019 | TF-CBT                                | Depression | 1.173                     | 0.274          | 0.075    | 0.636       | 1.710       | 4.279   | 0.000                 |
|                            |                                       |            | 0.607                     | 0.085          | 0.007    | 0.442       | 0.773       | 7.182   | 0.000                 |

**Table 17.**  
Anxiety Pre-Post Proxy-Reported Within-Group Effect Size.

| Study name                              | Condition | Outcome | Statistics for each study |                |          |             |             |         | Hedges's g and 95% CI |
|-----------------------------------------|-----------|---------|---------------------------|----------------|----------|-------------|-------------|---------|-----------------------|
|                                         |           |         | Hedges's g                | Standard error | Variance | Lower limit | Upper limit | Z-Value |                       |
| Diehle et al. 2015                      | TF-CBT    | Anxiety | 0.467                     | 0.337          | 0.113    | -0.193      | 1.127       | 1.387   | 0.166                 |
| Goldbeck et al. 2016; Tutus et al. 2017 | TF-CBT    | Anxiety | 0.564                     | 0.105          | 0.011    | 0.319       | 0.730       | 4.889   | 0.000                 |
| Stewart et al. 2017                     | TF-CBT    | Anxiety | 0.524                     | 0.094          | 0.009    | 0.339       | 0.708       | 5.571   | 0.000                 |

**Table 18.**  
PTSS Pre-FU III Proxy-Reported Within-Group Effect Size.

| Study name                              | Condition         | Outcome | Statistics for each study |                |          |             |             |         | Hedges's g and 95% CI |
|-----------------------------------------|-------------------|---------|---------------------------|----------------|----------|-------------|-------------|---------|-----------------------|
|                                         |                   |         | Hedges's g                | Standard error | Variance | Lower limit | Upper limit | Z-Value |                       |
| Dorsey et al. 2020                      | TF-CBT group (KR) | PTSS    | 2.952                     | 0.316          | 0.100    | 2.332       | 3.572       | 9.335   | 0.000                 |
| Dorsey et al. 2020                      | TF-CBT group (KU) | PTSS    | 2.906                     | 0.194          | 0.037    | 1.929       | 2.397       | 10.368  | 0.000                 |
| Dorsey et al. 2020                      | TF-CBT group (TR) | PTSS    | 2.919                     | 0.284          | 0.080    | 1.994       | 2.844       | 10.758  | 0.000                 |
| Dorsey et al. 2020                      | TF-CBT group (TU) | PTSS    | 2.720                     | 0.242          | 0.059    | 2.246       | 3.194       | 11.242  | 0.000                 |
| Goldbeck et al. 2016; Tutus et al. 2017 | TF-CBT            | PTSS    | 0.811                     | 0.147          | 0.022    | 0.522       | 1.099       | 5.904   | 0.000                 |
| O'Donnel et al. 2014                    | TF-CBT group      | PTSS    | 1.520                     | 0.205          | 0.042    | 1.119       | 1.921       | 7.426   | 0.000                 |
|                                         |                   |         | 2.017                     | 0.344          | 0.118    | 1.342       | 2.691       | 5.863   | 0.000                 |

KR = Kenia Rural; KU = Kenia Urban; TR = Tanzania Rural; TU = Tanzania Urban.

**Table 19.**  
PTSS FU III Between-Group Effect Size.

| Study name                                          | Condition                 | Outcome | Statistics for each study |                |          |             |             |         | Hedges's g and 95% CI |
|-----------------------------------------------------|---------------------------|---------|---------------------------|----------------|----------|-------------|-------------|---------|-----------------------|
|                                                     |                           |         | Hedges's g                | Standard error | Variance | Lower limit | Upper limit | Z-Value |                       |
| Brown et al. 2020                                   | TF-CBT                    | PTSS    | -0.698                    | 0.659          | 0.434    | -1.989      | 0.593       | -1.060  | 0.289                 |
| Cohen et al. 1998; 2005                             | TF-CBT                    | PTSS    | 0.472                     | 0.222          | 0.049    | 0.037       | 0.907       | 2.128   | 0.033                 |
| Cohen, Deblinger et al. 2004; Deblinger et al. 2006 | TF-CBT                    | PTSS    | 0.162                     | 0.162          | 0.026    | -0.000      | 0.635       | 1.967   | 0.050                 |
| Deblinger et al., 1996; 1999                        | TF-CBT (child only)       | PTSS    | 0.217                     | 0.307          | 0.094    | -0.385      | 0.820       | 0.707   | 0.480                 |
| Deblinger et al., 1996; 1999                        | TF-CBT (mother and child) | PTSS    | 0.468                     | 0.318          | 0.101    | -0.156      | 1.092       | 1.470   | 0.142                 |
| Dorsey et al. 2020                                  | TF-CBT group (KR)         | PTSS    | 0.946                     | 0.185          | 0.034    | 0.583       | 1.309       | 5.103   | 0.000                 |
| Dorsey et al. 2020                                  | TF-CBT group (KU)         | PTSS    | 0.747                     | 0.149          | 0.022    | 0.456       | 1.039       | 5.025   | 0.000                 |
| Dorsey et al. 2020                                  | TF-CBT group (TR)         | PTSS    | -0.066                    | 0.176          | 0.031    | -0.411      | 0.278       | -0.377  | 0.706                 |
| Dorsey et al. 2020                                  | TF-CBT group (TU)         | PTSS    | 0.165                     | 0.144          | 0.021    | -0.117      | 0.447       | 1.145   | 0.252                 |
| Jensen et al. 2014, 2017                            | TF-CBT                    | PTSS    | 0.169                     | 0.201          | 0.040    | -0.225      | 0.563       | 0.842   | 0.400                 |
| Nixon et al. 2012; 2017                             | TF-CBT                    | PTSS    | 0.175                     | 0.340          | 0.116    | -0.493      | 0.842       | 0.513   | 0.608                 |
|                                                     |                           |         | 0.345                     | 0.111          | 0.012    | 0.127       | 0.563       | 3.108   | 0.002                 |

KR = Kenia Rural; KU = Kenia Urban; TR = Tanzania Rural; TU = Tanzania Urban.

**Table 20.**  
Depression FU III Between-Group Effect Size.

| Study name                                          | Condition                 | Outcome    | Statistics for each study |                |          |             |             |         | Hedges's g and 95% CI |
|-----------------------------------------------------|---------------------------|------------|---------------------------|----------------|----------|-------------|-------------|---------|-----------------------|
|                                                     |                           |            | Hedges's g                | Standard error | Variance | Lower limit | Upper limit | Z-Value |                       |
| Brown et al. 2020                                   | TF-CBT                    | Depression | -0.297                    | 0.627          | 0.393    | -1.525      | 0.932       | -0.474  | 0.636                 |
| Cohen et al. 1998; 2005                             | TF-CBT                    | Depression | 0.176                     | 0.219          | 0.048    | -0.254      | 0.605       | 0.802   | 0.423                 |
| Cohen, Deblinger et al. 2004; Deblinger et al. 2006 | TF-CBT                    | Depression | 0.174                     | 0.160          | 0.026    | -0.141      | 0.488       | 1.082   | 0.279                 |
| Deblinger et al., 1996; 1999                        | TF-CBT (child only)       | Depression | 0.196                     | 0.307          | 0.094    | -0.406      | 0.798       | 0.639   | 0.523                 |
| Deblinger et al., 1996; 1999                        | TF-CBT (mother and child) | Depression | -0.168                    | 0.315          | 0.099    | -0.804      | 0.429       | -0.587  | 0.551                 |
| Dorsey et al. 2020                                  | TF-CBT group (KR)         | Depression | 0.200                     | 0.204          | 0.042    | -0.200      | 0.600       | 0.980   | 0.327                 |
| Dorsey et al. 2020                                  | TF-CBT group (KU)         | Depression | 0.137                     | 0.140          | 0.020    | -0.116      | 0.390       | 0.403   | 0.687                 |
| Dorsey et al. 2020                                  | TF-CBT group (TR)         | Depression | 0.137                     | 0.140          | 0.020    | -0.116      | 0.390       | 0.403   | 0.687                 |
| Dorsey et al. 2020                                  | TF-CBT group (TU)         | Depression | 0.137                     | 0.140          | 0.020    | -0.116      | 0.390       | 0.403   | 0.687                 |
| Jensen et al. 2014, 2017                            | TF-CBT                    | Depression | 0.137                     | 0.140          | 0.020    | -0.116      | 0.390       | 0.403   | 0.687                 |
| Nixon et al. 2012; 2017                             | TF-CBT                    | Depression | 0.137                     | 0.140          | 0.020    | -0.116      | 0.390       | 0.403   | 0.687                 |

# Child Maltreatment

**Table 21.**  
Anxiety FU III Between-Group Effect Size.

| Study name                                          | Condition | Outcome | Statistics for each study |                |          |             |             | Z-Value | p-Value | Hedges's g and 95% CI |
|-----------------------------------------------------|-----------|---------|---------------------------|----------------|----------|-------------|-------------|---------|---------|-----------------------|
|                                                     |           |         | Hedges's g                | Standard error | Variance | Lower limit | Upper limit |         |         |                       |
| Brown et al. 2020                                   | TF-CBT    | Anxiety | -1.308                    | 0.689          | 0.474    | -2.658      | 0.041       | -1.900  | 0.057   |                       |
| Cohen et al. 1998, 2005                             | TF-CBT    | Anxiety | 0.129                     | 0.219          | 0.048    | -0.304      | 0.565       | 0.573   | 0.586   |                       |
| Cohen, Deblinger et al. 2004; Deblinger et al. 2006 | TF-CBT    | Anxiety | 0.277                     | 0.163          | 0.026    | -0.038      | 0.593       | 1.723   | 0.085   |                       |
| Jensen et al. 2014, 2017                            | TF-CBT    | Anxiety | 0.202                     | 0.202          | 0.041    | -0.195      | 0.599       | 0.997   | 0.319   |                       |
| Nixon et al. 2012, 2017                             | TF-CBT    | Anxiety | 0.190                     | 0.341          | 0.116    | -0.472      | 0.857       | 0.537   | 0.577   |                       |
|                                                     |           |         | 0.163                     | 0.123          | 0.015    | -0.078      | 0.404       | 1.323   | 0.186   |                       |

**Table 22.**  
Grief FU III Between-Group Effect Size.

| Study name         | Condition         | Outcome | Statistics for each study |                |          |             |             | Z-Value | p-Value | Hedges's g and 95% CI |
|--------------------|-------------------|---------|---------------------------|----------------|----------|-------------|-------------|---------|---------|-----------------------|
|                    |                   |         | Hedges's g                | Standard error | Variance | Lower limit | Upper limit |         |         |                       |
| Brown et al. 2020  | TF-CBT            | Grief   | -0.694                    | 0.658          | 0.433    | -1.985      | 0.596       | -1.055  | 0.292   |                       |
| Dorsey et al. 2020 | TF-CBT group (KU) | Grief   | 0.607                     | 0.147          | 0.022    | 0.318       | 0.896       | 4.125   | 0.000   |                       |
| Dorsey et al. 2020 | TF-CBT group (TR) | Grief   | -0.036                    | 0.176          | 0.031    | -0.380      | 0.309       | -0.202  | 0.840   |                       |
| Dorsey et al. 2020 | TF-CBT group (TU) | Grief   | 0.216                     | 0.144          | 0.021    | -0.067      | 0.498       | 1.499   | 0.135   |                       |
| Dorsey et al. 2020 | TF-CBT group (KR) | Grief   | 0.472                     | 0.182          | 0.033    | 0.118       | 0.832       | 2.499   | 0.000   |                       |
|                    |                   |         | 0.327                     | 0.177          | 0.031    | -0.020      | 0.673       | 1.849   | 0.064   |                       |

**Table 23.**  
PTSS Post-Treatment Proxy-Reported Between-Group Effect Size.

| Study name                              | Condition                             | Outcome | Statistics for each study |                |          |             |             | Z-Value | p-Value | Hedges's g and 95% CI |
|-----------------------------------------|---------------------------------------|---------|---------------------------|----------------|----------|-------------|-------------|---------|---------|-----------------------|
|                                         |                                       |         | Hedges's g                | Standard error | Variance | Lower limit | Upper limit |         |         |                       |
| Dorsey et al. 2020                      | TF-CBT group (KR)                     | PTSS    | 1.677                     | 0.205          | 0.042    | 1.276       | 2.078       | 8.196   | 0.000   |                       |
| Dorsey et al. 2020                      | TF-CBT group (KU)                     | PTSS    | 0.764                     | 0.149          | 0.022    | 0.472       | 1.056       | 5.328   | 0.000   |                       |
| Dorsey et al. 2020                      | TF-CBT group (TR)                     | PTSS    | 0.369                     | 0.177          | 0.031    | 0.021       | 0.716       | 2.080   | 0.038   |                       |
| Dorsey et al. 2020                      | TF-CBT group (TU)                     | PTSS    | 0.313                     | 0.145          | 0.021    | 0.030       | 0.597       | 2.164   | 0.030   |                       |
| Goldbeck et al. 2016; Tutus et al. 2017 | TF-CBT                                | PTSS    | 0.420                     | 0.163          | 0.027    | 0.100       | 0.740       | 2.574   | 0.010   |                       |
| Langley et al. 2015                     | TF-CBT group (Bounce Back, immediate) | PTSS    | 0.908                     | 0.247          | 0.061    | 0.424       | 1.392       | 3.978   | 0.000   |                       |
| Santiago et al. 2018                    | TF-CBT group (Bounce Back, immediate) | PTSS    | -0.409                    | 0.276          | 0.076    | -0.951      | 0.132       | -1.481  | 0.139   |                       |
| Schottekorb et al. 2012                 | TF-CBT                                | PTSS    | -0.242                    | 0.397          | 0.158    | -1.021      | 0.536       | -0.610  | 0.542   |                       |
| Jaberghadi et al. 2004                  | TF-CBT                                | PTSS    | -0.179                    | 0.502          | 0.252    | -1.182      | 0.804       | -0.359  | 0.722   |                       |
|                                         |                                       |         | 0.461                     | 0.189          | 0.036    | 0.091       | 0.831       | 2.445   | 0.014   |                       |

KR = Kenia Rural; KU = Kenia Urban; TR = Tanzania Rural; TU = Tanzania Urban.

**Table 24.**  
Depression Post-Treatment Proxy-Reported Between-Group Effect Size.

| Study name           | Condition                             | Outcome    | Statistics for each study |                |          |             |             | Z-Value | p-Value | Hedges's g and 95% CI |
|----------------------|---------------------------------------|------------|---------------------------|----------------|----------|-------------|-------------|---------|---------|-----------------------|
|                      |                                       |            | Hedges's g                | Standard error | Variance | Lower limit | Upper limit |         |         |                       |
| Langley et al. 2015  | TF-CBT group (Bounce Back, immediate) | Depression | 0.588                     | 0.240          | 0.058    | 0.118       | 1.058       | 2.451   | 0.014   |                       |
| Santiago et al. 2018 | TF-CBT group (Bounce Back, immediate) | Depression | -0.315                    | 0.343          | 0.118    | -1.165      | 0.543       | -0.728  | 0.461   |                       |
| Diehle et al. 2015   | TF-CBT                                | Depression | 0.256                     | 0.233          | 0.054    | -0.202      | 0.713       | 1.095   | 0.273   |                       |



**Funnel Plot of Standard Error by Hedges's g for Depression (proxy-report, pre-post)**

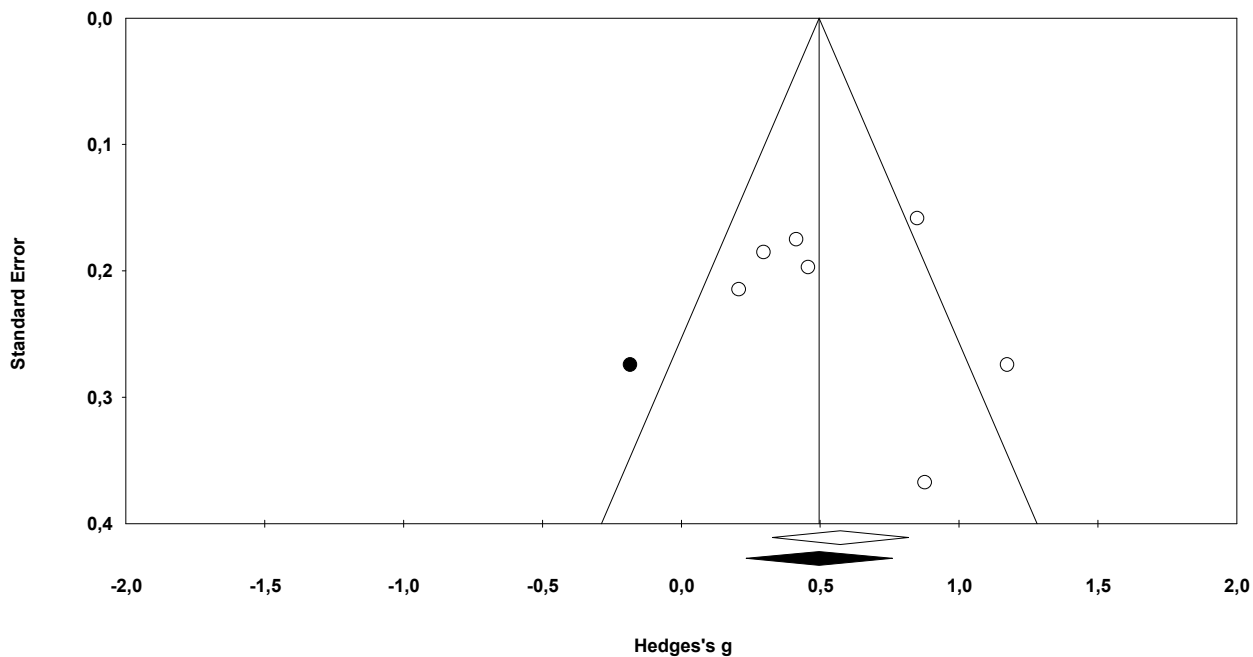

Note. Black circle represents imputed study.

**Funnel Plot of Standard Error by Hedges's g for PTSS (proxy-report, Pre-FU I)**

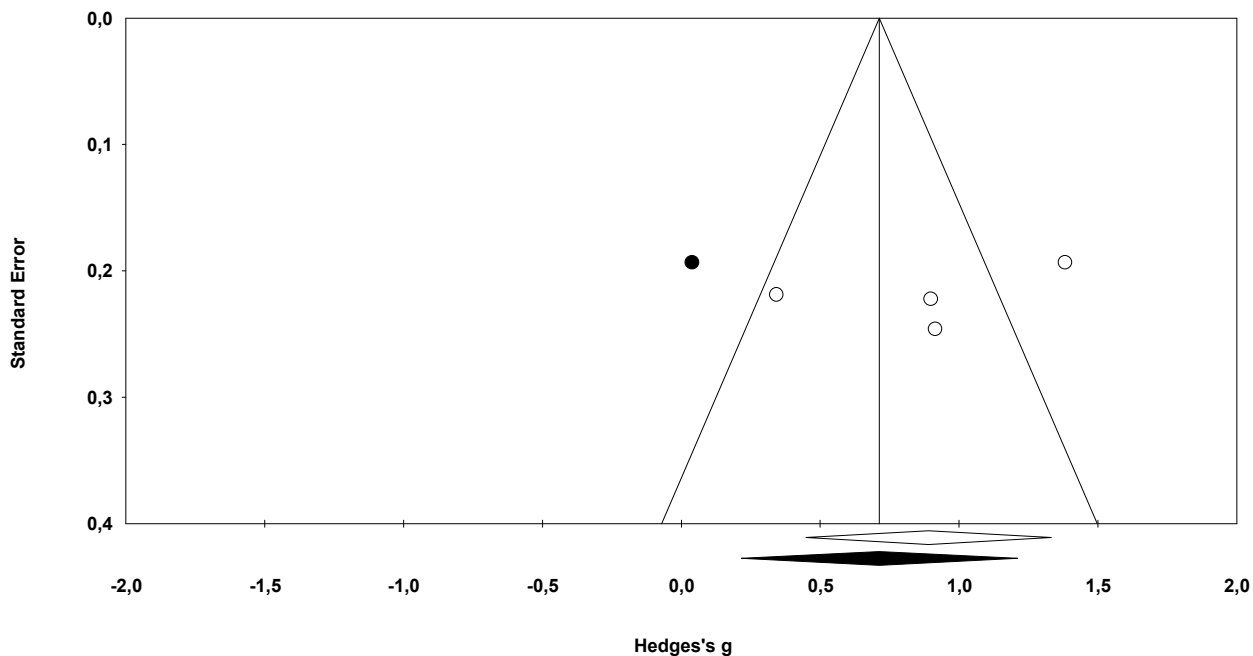

Note. Black circle represents imputed study.

**Funnel Plot of Standard Error by Hedges's g for PTSS (all studies, pre-FU III)**

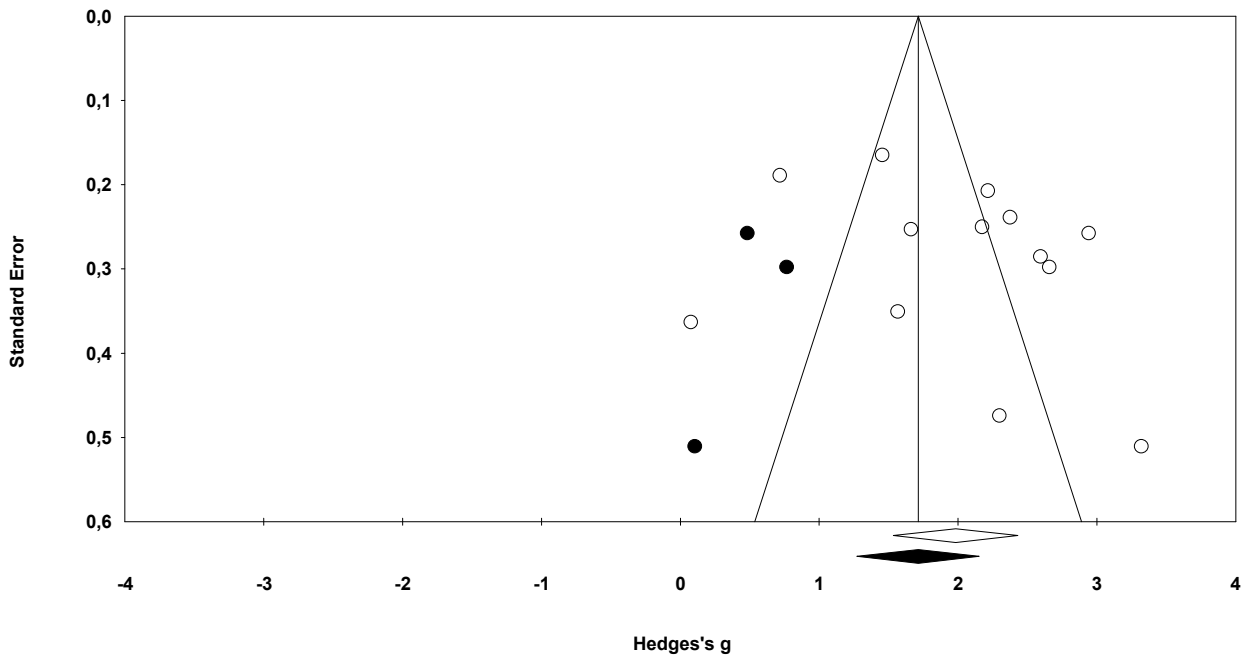

Note. Black circles represent imputed studies.

**Funnel Plot of Standard Error by Hedges's g for PTSS (RCTs only, Pre-FU III)**

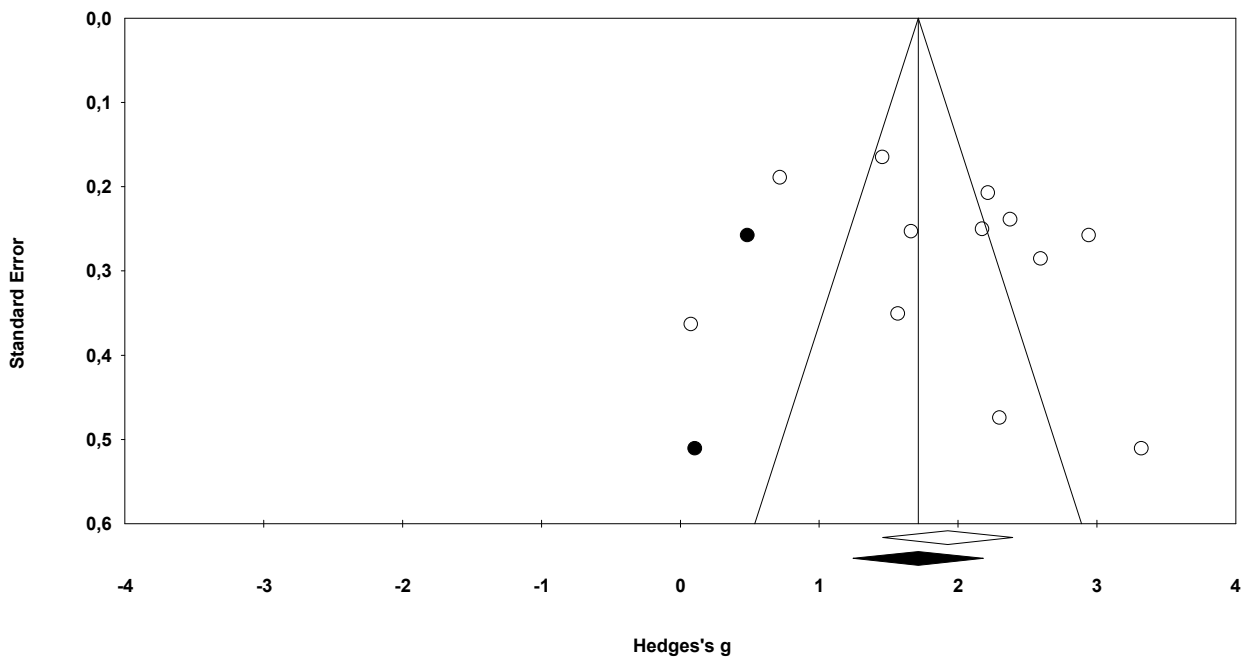

Note. Black circles represent imputed studies.

**Funnel Plot of Standard Error by Hedges's g for PTSS (Effectiveness RCTs, pre-FU III)**

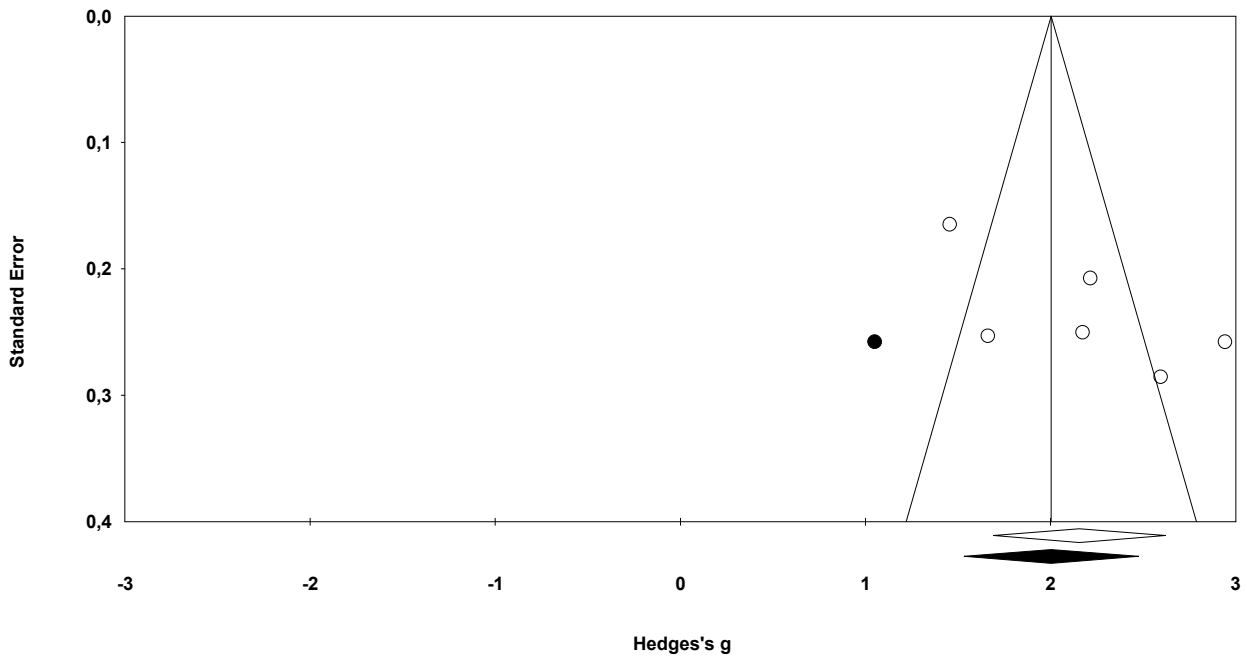

Note. Black circle represents imputed study.

**Funnel Plot of Standard Error by Hedges's g for Grief (all studies, pre-FU III)**

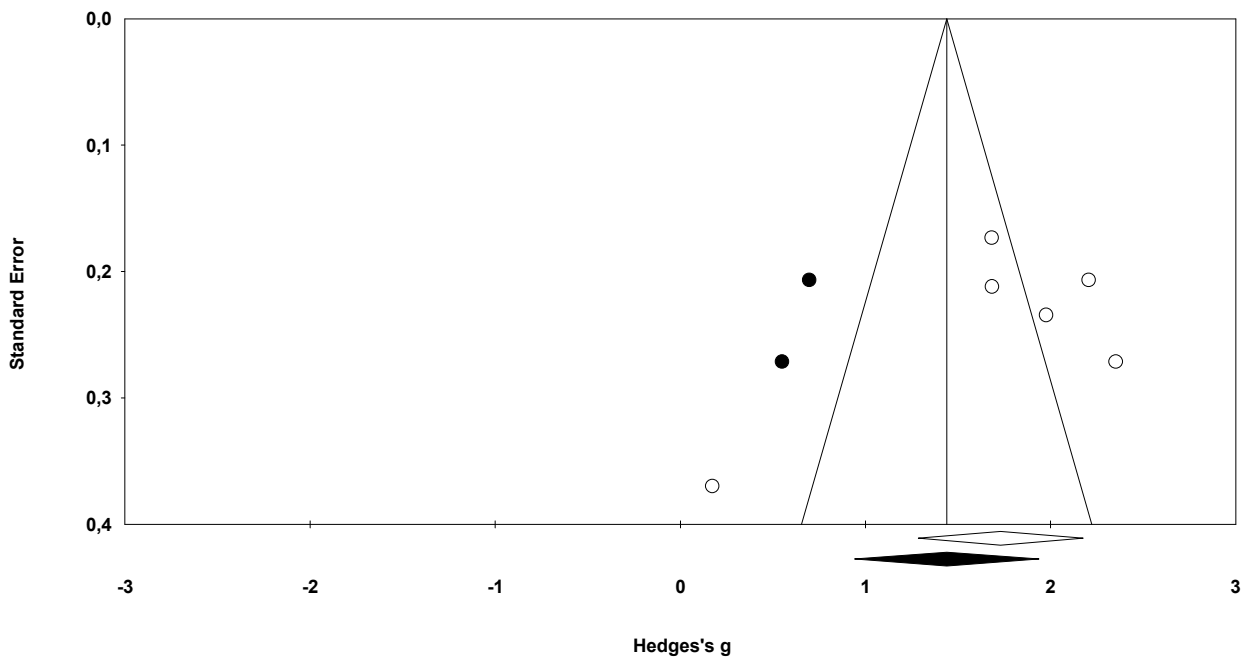

Note. Black circles represent imputed studies.

**Funnel Plot of Standard Error by Hedges's g for Grief (RCTs only, pre-FU III)**

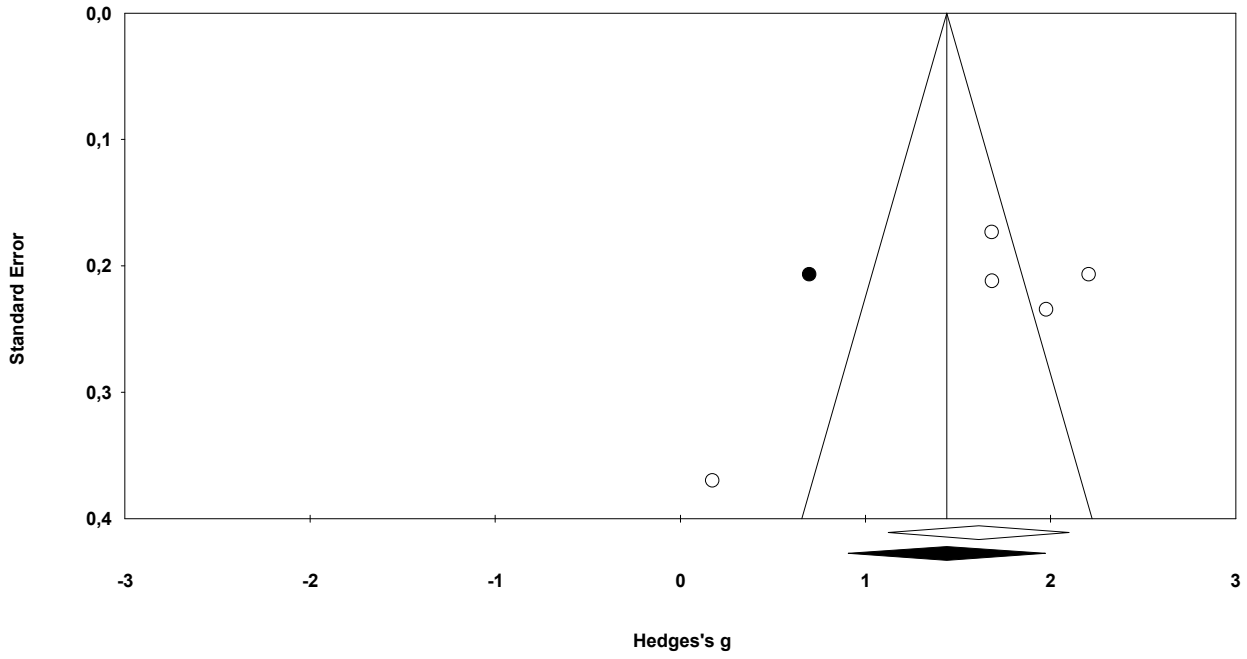

*Note.* Black circle represents imputed study.

**Table 25***Pre-FU I Within-Group Effect Sizes for PTSS, Depression and Anxiety.*

| Outcome             | Sample               | n                    | g                                             | 95% CI                       | SE                        | z          | Q                  | I <sup>2</sup>   | Duval and Tweedie |        |
|---------------------|----------------------|----------------------|-----------------------------------------------|------------------------------|---------------------------|------------|--------------------|------------------|-------------------|--------|
| PTSS                | All eligible studies | 9                    | (1.79)<br>1.63 <sup>a</sup>                   | (1.36 - 2.21)<br>1.22 - 2.04 | (0.22)                    | (8.25***)  | 25.89**            | 69.10            | 2                 |        |
|                     | Individual<br>Group  | 4                    | 1.71 <sup>b</sup>                             | 1.32 - 2.11                  | .20                       | 8.55***    | 1.55               | 0                | 0                 |        |
|                     |                      | 5                    | (1.87)<br>1.70                                | (1.15-2.59)<br>1.04 - 2.36   | (.37)                     | (5.07***)  | 24.26***           | 83.51            | 1                 |        |
|                     | RCTs only            | 8                    | (1.73)<br>1.42                                | (1.27-2.19)<br>.98 - 1.87    | (.26)                     | (7.36***)  | 21.08**            | 66.80            | 3                 |        |
|                     |                      | Efficacy             | 4                                             | 1.71 <sup>b</sup>            | 1.32 - 2.11               | .20        | 8.55***            | 1.55             | 0                 | 0      |
|                     |                      | Effectiveness        | 4                                             | 1.80                         | .91 - 2.70                | .46        | 3.95***            | 18.23***         | 83.54             | 0      |
|                     |                      | Individual<br>Group  | 4                                             | 1.71 <sup>b</sup><br>1.80    | 1.32 - 2.11<br>.91 - 2.70 | .20<br>.46 | 8.55***<br>3.95*** | 1.55<br>18.23*** | 0<br>83.54        | 0<br>0 |
|                     | Depression           | All eligible studies | 6                                             | .89                          | .54 - 1.24                | .18        | 4.95***            | 16.94**          | 70.49             | 0      |
| Individual<br>Group |                      | 3                    | .78 <sup>b</sup>                              | .48 - 1.07                   | .15                       | 5.10***    | .70                | 0                | 0                 |        |
|                     |                      | 3                    | .98                                           | .31 - 1.65                   | .34                       | 2.85**     | 14.90**            | 86.57            | 0                 |        |
| RCTs only           |                      | 5                    | .73 <sup>b</sup>                              | .51 - .94                    | .11                       | 6.62***    | 4.21               | 5.03             | 0                 |        |
| Anxiety             | All eligible studies | 4                    | (.62 <sup>b,c</sup> )<br>.38 <sup>a,b,c</sup> | (.37 - .88)<br>.17 - .59     | (.13)                     | (4.79***)  | 5.00               | 40.01            | 2                 |        |
|                     | RCTs only            | 4                    | (.62 <sup>b,c</sup> )<br>.38 <sup>a,b,c</sup> | (.37 - .88)<br>.17 - .59     | (.13)                     | (4.79***)  | 5.00               | 40.01            | 2                 |        |

*Note.* High risk of bias studies are excluded; n = number of included TF-CBT conditions. \*  $p < .05$ ; \*\*  $p < .01$ ; \*\*\*  $p < .001$ .

<sup>a</sup> Recalculated with imputed studies (trim and fill method according to Duval and Tweedie).

<sup>b</sup> Fixed model assumed due to non-significant Q-value.

<sup>c</sup> Analysis includes high risk of bias studies (calculation otherwise not possible due to low number of studies).

**Table 26***Pre-FU II Within-Group Effect Sizes for PTSS, Depression and Anxiety.*

| Outcome    | Sample               | n | g                                         | 95% CI                      | SE    | z         | Q        | I <sup>2</sup> | Duval and Tweedie |
|------------|----------------------|---|-------------------------------------------|-----------------------------|-------|-----------|----------|----------------|-------------------|
| PTSS       | All eligible studies | 9 | 1.65                                      | 1.07 - 2.24                 | .30   | 5.54***   | 82.41*** | 90.29          | 0                 |
|            | Individual           | 8 | 1.43                                      | .89 - 1.98                  | .28   | 5.12***   | 62.28*** | 88.76          | 0                 |
|            | RCTs only            | 8 | (1.79)<br>1.56 <sup>a</sup>               | (1.13 - 2.45)<br>.91 - 2.22 | (.34) | (5.33***) | 76.66*** | 90.87          | 1                 |
| Depression | All eligible studies | 8 | (.63 <sup>b</sup> )<br>.60 <sup>a,b</sup> | (.50 - .76)<br>.48 - .73    | (.07) | (9.40***) | 11.96    | 41.49          | 1                 |
|            | Individual           | 8 | (.63 <sup>b</sup> )<br>.60 <sup>a,b</sup> | (.50 - .76)<br>.48 - .73    | (.07) | (9.40***) | 11.96    | 41.49          | 1                 |
|            | RCTs only            | 7 | (.67 <sup>b</sup> )<br>.63 <sup>a,b</sup> | (.53 - .81)<br>.49 - .76    | (.07) | (9.46***) | 8.98     | 33.18          | 2                 |
| Anxiety    | All eligible studies | 5 | .82                                       | .52 - 1.11                  | .15   | 5.45***   | 10.36*   | 61.39          | 0                 |
|            | Individual           | 5 | .82                                       | .52 - 1.11                  | .15   | 5.45***   | 10.36*   | 61.39          | 0                 |
|            | RCTs only            | 5 | .82                                       | .52 - 1.11                  | .15   | 5.45***   | 10.36*   | 61.39          | 0                 |

*Note.* High risk of bias studies are excluded; n = number of included TF-CBT conditions. \*  $p < .05$ ; \*\*  $p < .01$ ; \*\*\*  $p < .001$ .

<sup>a</sup> Recalculated with imputed studies (trim and fill method according to Duval and Tweedie).

<sup>b</sup> Fixed model assumed due to non-significant Q-value.

**Table 27***Pre-Post Within-Group Effect Sizes for PTSS, Depression, Anxiety and Grief.*

| Outcome    | Sample | n  | g                                         | 95% CI                      | SE    | z         | Q         | I <sup>2</sup> | Duval and Tweedie |
|------------|--------|----|-------------------------------------------|-----------------------------|-------|-----------|-----------|----------------|-------------------|
| PTSS       | FU I   | 9  | 1.60                                      | 1.23 - 1.97                 | .19   | 8.39***   | 25.11**   | 68.13          | 0                 |
|            | FU II  | 9  | (1.18)<br>.92 <sup>a</sup>                | (.73 - 1.62)<br>.51 - 1.34  | (.23) | (5.20***) | 83.93***  | 90.47          | 2                 |
|            | FU III | 13 | (1.43)<br>1.38 <sup>a</sup>               | (1.00 - 1.86)<br>.97 - 1.80 | (.22) | (6.47***) | 216.91*** | 94.47          | 1                 |
| Depression | FU I   | 6  | .67                                       | .41 - .93                   | .14   | 4.98***   | 11.17*    | 55.23          | 0                 |
|            | FU II  | 8  | (.43 <sup>b</sup> )<br>.41 <sup>a,b</sup> | .31-.55<br>.30 - .52        | .06   | 7.15***   | 8.66      | 19.18          | 2                 |
|            | FU III | 9  | .71                                       | .41 - 1.01                  | .15   | 4.69***   | 46.58***  | 82.82          | 0                 |
| Anxiety    | FU I   | 4  | .43 <sup>b,c</sup>                        | .19 - .67                   | .12   | 3.56***   | 1.66      | 0              | 0                 |
|            | FU II  | 5  | .47                                       | .18-.77                     | .15   | 3.15**    | 13.92**   | 71.27          | 0                 |
|            | FU III | 6  | .55                                       | .27 - .83                   | .15   | 3.78***   | 20.27**   | 75.33          | 0                 |
| Grief      | FU III | 6  | 1.42 <sup>b</sup>                         | 1.27 - 1.57                 | .08   | 18.15***  | 4.07      | 0              | 0                 |

*Note.* High risk of bias studies are excluded; n = number of included TF-CBT conditions; Individual = TF-CBT conducted in

an individual treatment setting; Group = TF-CBT conducted in a group setting. \*  $p < .05$ ; \*\*  $p < .01$ ; \*\*\*  $p < .001$ .

<sup>a</sup> Recalculated with imputed studies (trim and fill method according to Duval and Tweedie).

<sup>b</sup> Fixed model assumed due to non-significant Q-value.

<sup>c</sup> Analysis includes high risk of bias studies (calculation otherwise not possible due to low number of studies).

**Table 28***Pre-Post Within-Group Effect Sizes for Proxy-Reported PTSS and Depression.*

| Outcome    | Sample | n | g                | 95% CI      | SE  | z       | Q        | I <sup>2</sup> | Duval and Tweedie |
|------------|--------|---|------------------|-------------|-----|---------|----------|----------------|-------------------|
| PTSS       | FU I   | 4 | .75              | .31 - 1.18  | .22 | 3.34**  | 13.90**  | 78.42          | 0                 |
|            | FU II  | 3 | .75 <sup>a</sup> | .23 - 1.27  | .27 | 2.81**  | 11.92**  | 83.23          | 0                 |
|            | FU III | 6 | 1.72             | 1.17 - 2.26 | .28 | 6.18*** | 58.74*** | 91.49          | 0                 |
| Depression | FU I   | 3 | .47              | .05 - .88   | .21 | 2.20*   | 7.92*    | 74.73          | 0                 |

*Note.* High risk of bias studies are excluded; n = number of included TF-CBT conditions; Individual = TF-CBT conducted in

an individual treatment setting; Group = TF-CBT conducted in a group setting. \*  $p < .05$ ; \*\*  $p < .01$ ; \*\*\*  $p < .001$ .

<sup>a</sup> Analysis includes high risk of bias studies (calculation otherwise not possible due to low number of studies).



**Table 29***Post-treatment Between-Group Effect Sizes for PTSS, Depression, Anxiety and Grief.*

| Assessment point | Outcome    | Sample           | n   | g                                             | 95% CI                     | SE    | z                      | Q                    | I <sup>2</sup> | Duval and Tweedie |
|------------------|------------|------------------|-----|-----------------------------------------------|----------------------------|-------|------------------------|----------------------|----------------|-------------------|
| FU I             | PTSS       | Any control      | 4   | (.69 <sup>a,b</sup> )<br>.58 <sup>a,b,c</sup> | (.34 - 1.04)<br>.26 - .90  | (.18) | (3.84 <sup>***</sup> ) | 3.33                 | 9.96           | 1                 |
|                  | Depression | Any control      | 4   | (.24 <sup>a,b</sup> )<br>.22 <sup>a,b,c</sup> | (-.10 - .58)<br>-.09 - .53 | (.17) | (1.37)                 | .09                  | 0              | 1                 |
| FU II            | PTSS       | TAU/AT           | 7   | .34 <sup>a</sup>                              | .15 - .53                  | .10   | 3.58 <sup>***</sup>    | 7.98                 | 24.83          | 0                 |
|                  | Depression | TAU/AT           | 6   | .32 <sup>a</sup>                              | .13 - .52                  | .10   | 3.24 <sup>**</sup>     | 2.98                 | 0              | 0                 |
|                  | Anxiety    | TAU/AT           | 4   | .20 <sup>a</sup>                              | -.02 - .42                 | .11   | 1.78                   | 6.89                 | 56.44          | 0                 |
| FU III           | PTSS       | TAU/AT           | 11  | .37                                           | .16 - .59                  | .11   | 3.39 <sup>**</sup>     | 29.80 <sup>**</sup>  | 66.45          | 0                 |
|                  |            | Efficacy         | 6   | .39 <sup>a</sup>                              | .19 - .59                  | .10   | 3.87 <sup>***</sup>    | 5.80                 | 13.84          | 0                 |
|                  |            | Effectiveness    | 5   | .42                                           | .06 - .77                  | .18   | 2.29 <sup>*</sup>      | 24.00 <sup>***</sup> | 83.33          | 0                 |
|                  |            | Individual Group | 7   | .42 <sup>a</sup>                              | .24 - .59                  | .09   | 4.70 <sup>***</sup>    | 6.06                 | 1.05           | 0                 |
|                  | Depression | TAU/AT           | 4   | .40                                           | -.05 - .84                 | .23   | 1.75                   | 23.62 <sup>***</sup> | 87.30          | 0                 |
|                  |            | TAU/AT           | 7   | .37 <sup>a</sup>                              | .20-.55                    | .09   | 4.25 <sup>***</sup>    | 4.09                 | 0              | 0                 |
|                  |            | TAU/AT           | 5   | .23 <sup>a</sup>                              | .04 - .41                  | .10   | 2.35 <sup>*</sup>      | 7.09                 | 43.59          | 0                 |
| Grief            | TAU/AT     | 5                | .30 | -.06 - .67                                    | .19                        | 1.63  | 19.58 <sup>**</sup>    | 79.57                | 0              |                   |

*Note.* High risk of bias studies are excluded; n = number of included comparisons; PTSS = Posttraumatic Stress Symptoms;

TAU/AT = Treatment as usual/active treatment control conditions; WL = Wait-list control conditions; Effectiveness =

Effectiveness RCTs only; Efficacy = Efficacy RCTs only; Individual = RCTs conducted in an individual treatment setting;

Group = RCTs conducted in a group setting. \*  $p < .05$ ; \*\*  $p < .01$ ; \*\*\*  $p < .001$ .

<sup>a</sup> Fixed model assumed due to non-significant Q-value.

<sup>b</sup> Analysis includes high risk of bias studies (calculation otherwise not possible due to low number of studies).

<sup>c</sup> Recalculated with imputed studies (trim and fill method according to Duval and Tweedie).

# Child Maltreatment

## Intention-to-treat

| Unique ID                               | Experimental | Comparator             | Outcome                          | D1 | D2 | D3 | D4 | D5 | Overall |                                               |
|-----------------------------------------|--------------|------------------------|----------------------------------|----|----|----|----|----|---------|-----------------------------------------------|
| Allen et al. 2021                       | TF-CBT       | TF-CBT                 | PTSS, depression, anxiety        | +  | +  | +  | +  | !  | !       | +                                             |
| Brown et al. 2020                       | TF-CBT       | TAU/AT                 | PTSS, depression, anxiety, grief | !  | +  | +  | +  | !  | !       | !                                             |
| Cohen et al. 1998, 2005                 | TF-CBT       | TAU/AT                 | PTSS, depression, anxiety        | +  | +  | +  | +  | !  | !       | -                                             |
| Davidson et al. 2018                    | TF-CBT       | TF-CBT                 | PTSS, depression                 | +  | -  | +  | +  | !  | -       |                                               |
| Diehle et al. 2015                      | TF-CBT       | TAU/AT                 | PTSS, depression, anxiety        | +  | +  | +  | +  | !  | !       | D1 Randomisation process                      |
| Dorsey et al. 2014                      | TF-CBT       | TF-CBT                 | PTSS, depression                 | +  | +  | +  | +  | !  | !       | D2 Deviations from the intended interventions |
| Dorsey et al. 2020                      | TF-CBT Group | TAU/AT                 | PTSS, grief                      | +  | +  | +  | +  | +  | +       | D3 Missing outcome data                       |
| Goldbeck et al. 2016; Tutus et al. 2017 | TF-CBT       | WL                     | PTSS, depression, anxiety        | +  | +  | +  | +  | +  | +       | D4 Measurement of the outcome                 |
| Jensen et al. 2014, 2017                | TF-CBT       | TAU/AT                 | PTSS, depression, anxiety        | +  | +  | +  | +  | +  | +       | D5 Selection of the reported result           |
| King et al. 2000                        | TF-CBT       | WL                     | PTSS, depression, anxiety        | +  | +  | +  | -  | !  | -       |                                               |
| Langley et al. 2015                     | TF-CBT Group | WL                     | PTSS, depression, anxiety        | +  | +  | +  | !  | !  | !       |                                               |
| Nixon et al. 2012, 2017                 | TF-CBT       | TAU/AT                 | PTSS, depression, anxiety        | +  | +  | +  | +  | !  | !       |                                               |
| O'Callaghan et al. 2013                 | TF-CBT Group | WL                     | PTSS                             | +  | +  | +  | +  | !  | !       |                                               |
| O'Callaghan et al. 2015                 | TF-CBT Group | TAU/AT                 | PTSS                             | +  | +  | +  | +  | !  | !       |                                               |
| Salloum et al. 2015                     | TF-CBT       | SC-TF-CBT <sup>a</sup> | PTSS                             | +  | +  | +  | +  | !  | !       |                                               |
| Santiago et al. 2018                    | TF-CBT Group | WL                     | PTSS, depression, anxiety        | +  | +  | +  | !  | !  | !       |                                               |

Note. TF-CBT = Trauma Focused Cognitive Behavioral Therapy; TAU = Treatment As Usual; AT = Active treatment; WL = Wait-List; SC-TF-CBT = Stepped Care Trauma Focused Cognitive Behavioral Therapy; PTSS = Posttraumatic Stress

Symptoms.

<sup>a</sup> SC-TF-CBT was excluded from analyses as some participants received TF-CBT while others did not.

## Per-protocol

| Unique ID                                | Experimental | Comparator | Outcome                   | D1 | D2 | D3 | D4 | D5 | Overall |                                               |
|------------------------------------------|--------------|------------|---------------------------|----|----|----|----|----|---------|-----------------------------------------------|
| Cohen et al. 2004; Deblinger et al. 2006 | TF-CBT       | TAU/AT     | PTSS, depression, anxiety | +  | +  | +  | +  | !  | !       | +                                             |
| Deblinger et al. 1996, 1999              | TF-CBT       | TAU/AT     | PTSS, depression, anxiety | +  | +  | +  | +  | !  | !       | !                                             |
| Jaberghaderi et al. 2004                 | TF-CBT       | TAU/AT     | PTSS                      | +  | -  | +  | +  | !  | -       | -                                             |
| McMullen et al. 2013                     | TF-CBT Group | WL         | PTSS                      | +  | +  | +  | +  | +  | +       | D1 Randomisation process                      |
| Schottelkorb et al. 2012                 | TF-CBT       | TAU/AT     | PTSS                      | +  | +  | +  | -  | !  | -       | D2 Deviations from the intended interventions |
|                                          |              |            |                           |    |    |    |    |    |         | D3 Missing outcome data                       |
|                                          |              |            |                           |    |    |    |    |    |         | D4 Measurement of the outcome                 |
|                                          |              |            |                           |    |    |    |    |    |         | D5 Selection of the reported result           |

Note. TF-CBT = Trauma Focused Cognitive Behavioral Therapy; TAU = Treatment As Usual; AT = Active treatment; WL = Wait-List; PTSS = Posttraumatic Stress Symptoms.

# Child Maltreatment

## Intention-to-treat

| Unique ID                    | Experimental | Outcome                          | D2 | D3 | D4 | D5 | Overall |   |                                               |
|------------------------------|--------------|----------------------------------|----|----|----|----|---------|---|-----------------------------------------------|
| Cohen, Mannarino et al. 2004 | TF-CBT       | PTSS, depression, anxiety, grief | +  | +  | !  | !  | !       | + | Low risk                                      |
| O'Donnel et al. 2014         | TF-CBT Group | PTSS, depression, grief          | +  | +  | !  | !  | !       | ! | Some concerns                                 |
| Stewart et al. 2017          | TF-CBT       | PTSS, depression, anxiety        | +  | +  | -  | !  | -       | - | High risk                                     |
| Unterhitzberger et al. 2019  | TF-CBT       | PTSS, depression                 | +  | +  | !  | !  | !       | ! | D2 Deviations from the intended interventions |
| Webb et al. 2014             | TF-CBT       | PTSS                             | +  | +  | -  | -  | -       | - | D3 Missing outcome data                       |
|                              |              |                                  |    |    |    |    |         |   | D4 Measurement of the outcome                 |
|                              |              |                                  |    |    |    |    |         |   | D5 Selection of the reported result           |

Note. TF-CBT = Trauma Focused Cognitive Behavioral Therapy; PTSS = Posttraumatic Stress Symptoms.

## Per-protocol

| Unique ID                 | Experimental | Outcome                          | D2 | D3 | D4 | D5 | Overall |   |                                               |
|---------------------------|--------------|----------------------------------|----|----|----|----|---------|---|-----------------------------------------------|
| Amaya-Jackson et al. 2018 | TF-CBT       | PTSS, depression                 | +  | !  | !  | !  | !       | + | Low risk                                      |
| Cohen et al. 2006         | TF-CBT       | PTSS, depression, anxiety, grief | +  | !  | !  | !  | !       | ! | Some concerns                                 |
| Espeleta et al. 2021      | TF-CBT       | PTSS, depression                 | !  | +  | !  | !  | !       | - | High risk                                     |
| Kirsch et al. 2011        | TF-CBT       | PTSS                             | ?  | -  | -  | !  | -       | ? | No information                                |
| Konanur et al. 2015       | TF-CBT       | PTSS                             | +  | -  | !  | -  | -       | - | D2 Deviations from the intended interventions |
| Lang et al. 2015          | TF-CBT       | PTSS, depression                 | +  | -  | -  | !  | -       | - | D3 Missing outcome data                       |
| Murray et al. 2013        | TF-CBT       | PTSS                             | +  | -  | !  | !  | -       | - | D4 Measurement of the outcome                 |
| Stewart et al. 2020       | TF-CBT       | PTSS, depression                 | +  | -  | -  | !  | -       | - | D5 Selection of the reported result           |

Note. TF-CBT = Trauma Focused Cognitive Behavioral Therapy; PTSS = Posttraumatic Stress Symptoms.

**Table 30***Pre-FU I and FU II Within-Group Effect Sizes for PTSS, Depression and Anxiety With High Risk of Bias Studies.*

| Assessment point | Outcome    | Sample      | n  | g                                         | 95% CI                       | SE     | z                      | Q                     | I <sup>2</sup> | Duval and Tweedie |
|------------------|------------|-------------|----|-------------------------------------------|------------------------------|--------|------------------------|-----------------------|----------------|-------------------|
| Pre-FU I         | PTSS       | All studies | 11 | (1.70)<br>1.57 <sup>a</sup>               | (1.34 - 2.06)<br>1.21 - 1.93 | (0.18) | (9.28 <sup>***</sup> ) | 26.98 <sup>**</sup>   | 62.94          | 2                 |
|                  | Depression | All studies | 8  | .82                                       | .52 - 1.11                   | .15    | 5.45 <sup>***</sup>    | 19.29 <sup>**</sup>   | 63.71          | 0                 |
|                  | Anxiety    | All studies | 4  | (.62 <sup>b</sup> )<br>.38 <sup>a,b</sup> | (.37 - .88)<br>.17 - .59     | (.13)  | (4.79 <sup>***</sup> ) | 5.00                  | 40.01          | 2                 |
| Pre-FU II        | PTSS       | All studies | 10 | 1.50                                      | .95 - 2.06                   | .28    | 5.29 <sup>***</sup>    | 113.67 <sup>***</sup> | 92.08          | 0                 |
| Pre-FU III       | PTSS       | All studies | 14 | (1.93)<br>1.68                            | (1.52 - 2.35)<br>1.26 - 2.09 | (.21)  | (9.15 <sup>***</sup> ) | 124.27 <sup>***</sup> | 89.54          | 3                 |

*Note.* High risk of bias studies included; n = number of included TF-CBT conditions. \*  $p < .05$ ; \*\*  $p < .01$ ; \*\*\*  $p < .001$

<sup>a</sup> Recalculated with imputed studies (trim and fill method according to Duval and Tweedie).

<sup>b</sup> Fixed model assumed due to non-significant Q-value.

**Table 31**

*Within-Group and Between-Group Effect Sizes for Proxy-Reported PTSS, Depression and Anxiety With High Risk of Bias Studies.*

| Analysis      | Assessment point | Outcome    | n  | g                | 95% CI      | SE    | z         | Q         | I <sup>2</sup> | Duval and Tweedie |
|---------------|------------------|------------|----|------------------|-------------|-------|-----------|-----------|----------------|-------------------|
| Within-group  | Pre-Post         | PTSS       | 28 | 1.01             | .79 - 1.24  | .12   | 8.84***   | 248.11*** | 89.12          | 0                 |
|               |                  | Depression | 10 | (.61)            | (.44 - .77) | (.09) | (7.18***) | 18.39*    | 59.44          | 1                 |
|               |                  | Anxiety    | 3  | .57 <sup>a</sup> | .39 - .74   |       |           |           |                |                   |
|               | Pre-FU II        | PTSS       | 3  | .52 <sup>b</sup> | .34 - .71   | .09   | 5.55***   | .08       | 0              | 0                 |
| Between-group | Post             | PTSS       | 9  | .88              | .30 - 1.46  | .09   | 2.96**    | 12.86     | 84.45          | 0                 |
|               |                  |            |    | .46              | .09 - .83   | .19   | 2.45*     | 57.00***  | 85.97          | 0                 |

*Note.* High risk of bias studies included; n = number of included comparisons; PTSS = Posttraumatic Stress Symptoms.

\*  $p < .05$ ; \*\*  $p < .01$ ; \*\*\*  $p < .001$

<sup>a</sup> Recalculated with imputed studies (trim and fill method according to Duval and Tweedie).

<sup>b</sup> Fixed model assumed due to non-significant Q-value.

**Tabel 32***Criteria for Efficacy and Effectiveness trials*

| <b>Criterion</b>     | <b>Efficacy</b>                                                                                                                                  | <b>Effectiveness</b>                                                                                                                                                     |
|----------------------|--------------------------------------------------------------------------------------------------------------------------------------------------|--------------------------------------------------------------------------------------------------------------------------------------------------------------------------|
| Title                | Efficacy trial...                                                                                                                                | Effectiveness trial...                                                                                                                                                   |
| Setting              | University-affiliated clinic/highly controlled setting                                                                                           | dissemination and implementation in the 'real world'/less constraint settings (schools, primary mental health care, multiple clinics with different structures)          |
| Inclusion criteria   | Stringent (e.g. only single trauma, full-blown PTSD, no comorbidities, prerandomization run-in periods to exclude placebo-responders etc.)       | Inclusive (multiple traumas, only few symptoms required, different patient characteristics etc.)                                                                         |
| Statistical analysis | Completer analysis typical of efficacy                                                                                                           | Intention-to-treat typical of effectiveness                                                                                                                              |
| Adaptations          | None or only in such a way that they can be systematically evaluated (e.g. adding components)                                                    | To make intervention more acceptable to patient group (e.g. considering culturally important aspects, moving component order, spending more time on specific components) |
| Therapists           | Highly trained, standardized training                                                                                                            | Less training or variation in training                                                                                                                                   |
| Caregivers           | Participation required                                                                                                                           | Not required or only if available                                                                                                                                        |
| Control Condition    | Waitlist not allowing for other treatments, if active, also manualized and highly controlled, more than 1 TF-CBT condition (dismantling studies) | Everything that can be considered treatment as usual and is not highly controlled                                                                                        |
